# Supplementary material for: Beyond cycle lanes and large-scale infrastructure: a scoping review of initiatives that groups and organisations can implement to promote cycling for the Cycle Nation Project
Source: PubMed Central journal article supplement — Br J Sports Med. 2020 Apr 8;54(23):1405–15. doi: 10.1136/bjsports-2019-101447 (PMC7677468; doi:10.1136/bjsports-2019-101447), 2020-04-08
Supplement: bjsports-2019-101447supp001.pdf [file bjsports-2019-101447supp001.pdf]

**Table 4. Overview of studies included in scoping review (n=129) \*From Michie et al's Behaviour Change Wheel<sup>1</sup>**

| Study/<br>Report<br>Author | Year | Location | Population<br>age group | Setting    | Summary                                                                                                                                                                                                                      | Relevant<br>intervention<br>function(s)*                                | Findings                                                                                                                                                                                                                      |
|----------------------------|------|----------|-------------------------|------------|------------------------------------------------------------------------------------------------------------------------------------------------------------------------------------------------------------------------------|-------------------------------------------------------------------------|-------------------------------------------------------------------------------------------------------------------------------------------------------------------------------------------------------------------------------|
| Mayer <sup>2</sup>         | 1982 | USA      | Adults                  | University | A community-based intervention for encouraging cycling. Individuals offered cash or vouchers for modal shift to cycling or for increasing cycling. Intervention lasting 3 weeks involving all individuals using a bike path. | Incentivisation                                                         | Evaluation data collected from 464 individuals. During incentive period, biking frequency at the experimental bike path was significantly greater than during pre-incentive condition. However, these effects were transient. |
| Alcott <sup>3</sup>        | 1991 | USA      | Adults                  | Workplace  | Effects of the Clean Air Force campaign "Don't drive 1 in 5" (1989-1990) on attitudes and commuter behaviour change. Almost 100,000 workers from 81 different employers took part in multi-component intervention.           | Environmental restructuring (social)<br><br>Persuasion<br><br>Education | Evaluation data collected from n=701. Pre 1988-1990 campaign measurement showed 5% of participants cycled to work. Post measurement showed 7% cycled to work.                                                                 |
| Shoup <sup>4</sup>         | 1997 | USA      | Adults                  | Workplace  | Eight case studies evaluating the effects of a parking cash out program. Employees from 8 workplaces who complied with California's cash out requirement took part.                                                          | Incentivisation                                                         | Evaluation data collected from n=1694. Evaluation showed walking and cycling increased by 33%.                                                                                                                                |
| Macarthur <sup>5</sup>     | 1998 | Canada   | Children                | School     | Evaluation of a bicycle skills training program for young children: 'Kids CAN-BIKE' festival. Grade 4 children recruited from 6 elementary schools in one district borough received a 90 minute cycle training session.      | Training                                                                | Evaluation data collected from n=117. This brief skills training program was not effective in improving safe cycling behaviour, knowledge, or attitudes among grade 4 children.                                               |
| Cooper <sup>6</sup>        | 1999 | Canada   | Children                | School     | Evaluation of the Kids CAN-BIKE training program for young children. Grade 4 children from six elementary schools in East York took part in this one off festival event (90 minutes)                                         | Training                                                                | Evaluation data collected from n=141. No significant difference in skills change between intervention and control groups. This brief skills training festival was not                                                         |

|                           |      |                |         |           |                                                                                                                                                                                                               |                                                                                           |                                                                                                                                                                                                                                        |
|---------------------------|------|----------------|---------|-----------|---------------------------------------------------------------------------------------------------------------------------------------------------------------------------------------------------------------|-------------------------------------------------------------------------------------------|----------------------------------------------------------------------------------------------------------------------------------------------------------------------------------------------------------------------------------------|
|                           |      |                |         |           |                                                                                                                                                                                                               |                                                                                           | effective in improving safe cycling behaviour in grade 4 children.                                                                                                                                                                     |
| Pucher <sup>7</sup>       | 1999 | USA and Canada | Various | Various   | This study describes recent trends and multiple policies aiming to promote cycling in North America.                                                                                                          | Environmental restructuring (physical and social)<br><br>Education                        | Specific evaluation for each policy not reported. Concluded that there has been a bicycling renaissance underway over the past two decades, with growing cycling levels and widespread interest in cycling in both the USA and Canada. |
| Cleary <sup>8</sup>       | 2000 | UK             | Adults  | Workplace | A case study evaluation of the Cycle Challenge project; 'Nottingham Cycle-Friendly Employers'. Employees from 8 large employers in Greater Nottingham area were focus of this project from 1996-98.           | Environmental restructuring (social and physical)<br><br>Incentivisation<br><br>Education | 42% of cycling respondents (n not reported) indicated that their level of cycle commuting had increased during the life of the project.                                                                                                |
| Mutrie <sup>9</sup>       | 2002 | UK             | Adults  | Workplace | A randomised controlled trial of the self-help intervention 'Walk in to Work Out' aiming to improve active commuting. Employees from 3 workplaces in the city of Glasgow, Scotland took part in intervention. | Education<br><br>Enablement                                                               | Evaluation data received from n=295. Intervention was not successful at increasing cycling to work.                                                                                                                                    |
| TravelSmart <sup>10</sup> | 2002 | Australia      | All     | Home      | Final report of the TravelSmart Suburbs Brisbane project. Residents in over 450 households in inner northern suburbs of Brisbane were focus of this project (May to Nov 2001)                                 | Persuasion<br><br>Environmental restructuring (social)                                    | Before and after surveys showed cycling increased by 6% (n= not reported).                                                                                                                                                             |

|                        |      |           |          |           |                                                                                                                                                                                                                                                |                                                                                                |                                                                                                                                                                                                                                                                 |
|------------------------|------|-----------|----------|-----------|------------------------------------------------------------------------------------------------------------------------------------------------------------------------------------------------------------------------------------------------|------------------------------------------------------------------------------------------------|-----------------------------------------------------------------------------------------------------------------------------------------------------------------------------------------------------------------------------------------------------------------|
|                        |      |           |          |           |                                                                                                                                                                                                                                                | Education                                                                                      |                                                                                                                                                                                                                                                                 |
| Staunton <sup>11</sup> | 2003 | USA       | Children | School    | Evaluation of the Safe Routes to School program in Marin County. Children from public and private schools in Marin County (middle- and upper- class community on the California coast). Ongoing at the time.                                   | Education<br>Environmental restructuring (social)<br>Incentivisation<br>Training<br>Persuasion | Evaluation data collected from n=1611 in Spring 2002. Participating public schools reported an increase in school trips made by walking (64%), biking (114%), and carpooling (91%) and a decrease in trips by private vehicles carrying only one student (39%). |
| Merom <sup>12</sup>    | 2003 | Australia | Adults   | Community | Evaluation of an environmental intervention promoting walking and cycling; the newly constructed Rail Trail in Western Sydney. Participants were potential cyclists and pedestrians living within 5km of a new cycleway. 3 month intervention. | Persuasion<br>Environmental restructuring (social)                                             | Evaluation data collected from n=450. The campaign reached and influenced cyclists in the inner evaluation area with increases in awareness, use and cycling time and mean bike counts found                                                                    |
| Rowland <sup>13</sup>  | 2003 | UK        | Children | School    | A randomised controlled trial of site specific advice on school travel patterns. Children recruited from 21 primary schools in London boroughs. Duration: 1 school year.                                                                       | Environmental restructuring (social)                                                           | 1386 provided evaluation data.<br>No evidence that this assistance changes children's travel patterns.                                                                                                                                                          |

|                           |      |           |        |           |                                                                                                                                                                                                                                      |                                                                                                |                                                                                                                                                                                                                                                                                                                                                                                                                           |
|---------------------------|------|-----------|--------|-----------|--------------------------------------------------------------------------------------------------------------------------------------------------------------------------------------------------------------------------------------|------------------------------------------------------------------------------------------------|---------------------------------------------------------------------------------------------------------------------------------------------------------------------------------------------------------------------------------------------------------------------------------------------------------------------------------------------------------------------------------------------------------------------------|
| TravelSmart <sup>14</sup> | 2003 | Germany   | Adults | Home      | Evaluation of TravelSmart Viernheim Household Transport project. Inhabitants within households within 3 target areas of Viernhem (Jan – March 2001).                                                                                 | Incentivisation<br><br>Persuasion<br><br>Education<br><br>Environmental restructuring (social) | With Individualised Marketing, the share of environmentally-friendly modes increased by the following percentage: Walking: 7 %, Bicycle: 10 % (n=900 for evaluation data).                                                                                                                                                                                                                                                |
| TravelSmart <sup>15</sup> | 2004 | Australia | All    | Home      | Evaluation of the TravelSmart Household Program in parts of the Perth Metropolitan Area (2001-2005). Residents in households in Melville 3940 households received information.                                                       | Persuasion<br><br>Education<br><br>Incentivisation<br><br>Enablement                           | Cycling as a main travel mode increased from 1 to 2%. Relative changes to mode choice: cycling went from 12% to 21% so this is a 75% relative increase in mode choice for number of trips per person per year (n=2763 in before survey from target and control groups, n=1300 from target group in after survey)                                                                                                          |
| Wen <sup>16</sup>         | 2005 | Australia | Adults | Workplace | Evaluation of a pilot study in Australia promoting active transport in a workplace setting. Randomly selected health service employees (n= 68) working at healthcare facility in inner-city Sydney received intervention (12 months) | Persuasion                                                                                     | Reduction in the proportion of participants who drove to work 5 days per week and a decrease in trips travelled by car on weekends. In addition, there was high awareness of the intervention amongst participants and their understanding of the concept of active transport improved from 17.6% at baseline to 94.1% at the follow-up survey (p 0.01). There was also a significant shift in attitudes, which suggested |

|                           |      |             |         |                        |                                                                                                                                                                                                                                              |                                            |                                                                                                                                                                                                                                                                                                                                                                                                                |
|---------------------------|------|-------------|---------|------------------------|----------------------------------------------------------------------------------------------------------------------------------------------------------------------------------------------------------------------------------------------|--------------------------------------------|----------------------------------------------------------------------------------------------------------------------------------------------------------------------------------------------------------------------------------------------------------------------------------------------------------------------------------------------------------------------------------------------------------------|
|                           |      |             |         |                        |                                                                                                                                                                                                                                              |                                            | increased positive regard for active transport. Evaluation n=45.                                                                                                                                                                                                                                                                                                                                               |
| Bowles <sup>17</sup>      | 2006 | Australia   | Adults  | Other (sporting event) | An investigation into who participates in mass cycle events. Subsample of online registrants in a mass cycling event in Sydney attended this 1 day event (n=1,135).                                                                          | Environmental restructuring (social)       | Participants of mass cycle event more likely to be middle aged, male, have high baseline self-rated cycling ability, regular cyclists. In first time participants in this cycling event, there was a significant increase in mean number of times cycled in months post-event in comparisons to pre-event. Evaluation n=918.                                                                                   |
| Telfer <sup>18</sup>      | 2006 | Australia   | Adults  | Online                 | Pilot intervention of a cycling proficiency training program in central Sydney. General public (n=113) were recruited through promotional flyers, posters and adverts in local newspapers for this intervention (6 hours of cycle training). | Training                                   | At 2-month follow-up, the course had significantly increased participants' self-reported skills and confidence for cycling. More than half of the participants (56%) said they cycled more 2 months after the course. There was a 40% increase in participants having cycled in the previous week at follow-up among baseline non-cyclists, although this was not statistically significant. Evaluation n=105. |
| TravelSmart <sup>19</sup> | 2006 | UK          | All     | Home                   | Report on TravelSmart individualised travel marketing campaign in Bessacarr. A total of 1134 households in Doncaster received intervention.                                                                                                  | Education<br>Incentivisation<br>Persuasion | After survey received 1871 responses. There was a 1% point increase in cycling as main mode from 2 to 3%. In terms of trips per person per year, a 14% relative increase in cycling was seen (22% to 25%).                                                                                                                                                                                                     |
| Martens <sup>20</sup>     | 2007 | Netherlands | Various | Various                | Study describing cycling promotion efforts in the Netherlands                                                                                                                                                                                | Environmental restructuring (physical)     | Evaluation of specific projects not reported. Overall conclusion: Small changes to infrastructure have been beneficial for                                                                                                                                                                                                                                                                                     |

|                           |      |           |          |           |                                                                                                                                                                                              |                                                                     |                                                                                                                                                                                                                           |
|---------------------------|------|-----------|----------|-----------|----------------------------------------------------------------------------------------------------------------------------------------------------------------------------------------------|---------------------------------------------------------------------|---------------------------------------------------------------------------------------------------------------------------------------------------------------------------------------------------------------------------|
|                           |      |           |          |           |                                                                                                                                                                                              |                                                                     | cycling levels in the Netherlands                                                                                                                                                                                         |
| Groesz <sup>21</sup>      | 2007 | USA       | Children | School    | A conceptual evaluation of a school-based utilitarian exercise model: BikeTexa Safe. 4th and 5th grade school children from 7 schools in Texas received intervention. Duration not reported. | Training<br>Incentivisation<br>Environmental restructuring (social) | Experimental students displayed greater knowledge, a trend toward greater motivation, and greater recreational cycling at follow-up compared to waitlist students. Evaluation data from children n=118 and parents n=186. |
| Rose <sup>22</sup>        | 2007 | Australia | Adults   | Community | Evaluation of a major ride to work day event. Workplace employees who had expressed a desire to participate in the ride to work day event were involved in this study (n=5577).              | Environmental restructuring (social)<br>Education                   | More than one in four (27%) of those who rode to work for the first time as part of the event were still riding to work five months after the event (evaluation n=1952)                                                   |
| TravelSmart <sup>23</sup> | 2007 | Sweden    | Adults   | Home      | TravelSmart International Review: IndiMark program. 17,000 people received initial information,                                                                                              | Environmental restructuring (social)                                | In total project resulted in increase by 11% relative figures in market share of green modes (53% to 59%), largest increase was noted for cycling with a 45% increase in relative figures. Evaluation n not reported.     |
|                           |      | Sweden    | All      | Home      | TravelSmart International Review: SMART road user program. 5 towns outside Lund where large groups of people commuted to Lund. In total the                                                  | Education                                                           | Evaluation not conducted.                                                                                                                                                                                                 |

|                         |      |             |          |           |                                                                                                                                                                                                                                                                                                |                                          |                                                                                                                                                                                                                                            |
|-------------------------|------|-------------|----------|-----------|------------------------------------------------------------------------------------------------------------------------------------------------------------------------------------------------------------------------------------------------------------------------------------------------|------------------------------------------|--------------------------------------------------------------------------------------------------------------------------------------------------------------------------------------------------------------------------------------------|
|                         |      |             |          |           | SMART road user campaign was in contact with about 10,500 residents and 7,000 employees                                                                                                                                                                                                        |                                          |                                                                                                                                                                                                                                            |
|                         |      | UK          | Adults   | Home      | <p>TravelSmart International Review: Intelligent travel in city of York program. Covered three wards in the City of York within these wards four different areas were selected as the study area. Recruited via telephone or post.</p> <p>Random sample of 5,701 households were contacted</p> | <p>Persuasion</p> <p>Incentivisation</p> | In intervention group, 1% increase (or 33.333% relative increase) in cycling before/after intervention. However 1% point increase also seen in non-intervention group. Evaluation n=339.                                                   |
| Darling <sup>24</sup>   | 2008 | New Zealand | Children | Community | Description of a community intervention to encourage cycling in children: Kids on Bikes. 101 children aged 4-12 received intervention. Training was one night a week, number of weeks not reported.                                                                                            | <p>Training</p> <p>Enablement</p>        | Evaluation not reported.                                                                                                                                                                                                                   |
| Fesperman <sup>25</sup> | 2008 | USA         | Children | School    | A comparison case study on active transport to and from school. Children from two North Carolina Schools received intervention.                                                                                                                                                                | <p>Persuasion</p> <p>Education</p>       | <p>16 key stakeholders interviewed.</p> <p>Challenges to active transport identified were funding, school location, available infrastructure, community involvement, school support, parental buy-in, ad sufficient program promotion.</p> |
| Wen <sup>26</sup>       | 2008 | Australia   | Children | School    | A cluster randomised controlled trial aiming to increase active travel in school. Pupils from 24 primary public schools in inner city west Sydney received intervention (ongoing at time).                                                                                                     | Education                                | <p>Evaluation data provided from 1966 students and 1606 parents.</p> <p>No cycling outcomes reported.</p>                                                                                                                                  |

|                           |      |        |                     |           |                                                                                                                                                                                                                                                                                                                     |                                                        |                                                                                                                                                                                                                                                                                                                                                                                            |
|---------------------------|------|--------|---------------------|-----------|---------------------------------------------------------------------------------------------------------------------------------------------------------------------------------------------------------------------------------------------------------------------------------------------------------------------|--------------------------------------------------------|--------------------------------------------------------------------------------------------------------------------------------------------------------------------------------------------------------------------------------------------------------------------------------------------------------------------------------------------------------------------------------------------|
|                           |      |        |                     |           |                                                                                                                                                                                                                                                                                                                     |                                                        |                                                                                                                                                                                                                                                                                                                                                                                            |
| TravelSmart <sup>27</sup> | 2008 | UK     | All                 | Home      | Report on the TravelSmart individualised travel marketing campaigns in Preston, South Ribble and Lancaster (2006-2007). Households in Lancaster were contacted to register interest to take part. In total, deliveries containing 99,758 items of information and rewards were made to a total of 9,867 households. | Education<br><br>Incentivisation                       | Evaluation data provided from 1743 in Preston & South Ribble, 1863 in Lancaster City and Morecambe. Preston: changes in trips by main mode (trips per person/year) - cycling went from 17% to 23% (so a relative increase of 35% or 5%points). Total travel time did not change significantly, just mode share. Cycling relative growth (trips per person per year) was +69% (+20%points). |
| Chatterjee <sup>28</sup>  | 2009 | UK     | Adults and Children | Various   | A comparative evaluation of large-scale personal travel planning projects in England. 7 pilots targeted households in residential areas in England, and 6 targeted employees in workplaces, and 2 pupils in schools (various projects lasting 1-4 months)                                                           | Persuasion<br><br>Incentivisation                      | Cycling share increased by 1 percentage point in 8 of the 14 pilot studies. In the other 6 it remained constant, did not decrease.                                                                                                                                                                                                                                                         |
| Hamamoto <sup>29</sup>    | 2009 | USA    | All                 | Community | Description of two active living projects aiming to inspire community participation in cycling. A low-income community in Hawaii was target group of this intervention. Bicycle repair and recycle programme.                                                                                                       | Enablement<br><br>Environmental restructuring (social) | Evaluation not reported.                                                                                                                                                                                                                                                                                                                                                                   |
| Hemmingsson <sup>30</sup> | 2009 | Sweden | Adults              | Community | A randomised controlled trial of an intervention aiming to increase PA in abdominally obese women through support for changing commuting habits. 60 healthy female volunteers in Stockholm recruited from a single newspaper advertisement                                                                          | Persuasion<br><br>Enablement                           | 38.7 of intervention group achieved cut off for cycling treatment success (greater than 2km/day) compared with 8.9% in active control group (evaluation n=54).                                                                                                                                                                                                                             |



|                          |      |             |              |                                           |                                                                                                                                                                                                                                                           |                                                                                      |                                                                                                                                                                                                                                                                                                                                                                                                                                                                                                                                                                   |
|--------------------------|------|-------------|--------------|-------------------------------------------|-----------------------------------------------------------------------------------------------------------------------------------------------------------------------------------------------------------------------------------------------------------|--------------------------------------------------------------------------------------|-------------------------------------------------------------------------------------------------------------------------------------------------------------------------------------------------------------------------------------------------------------------------------------------------------------------------------------------------------------------------------------------------------------------------------------------------------------------------------------------------------------------------------------------------------------------|
|                          |      |             |              |                                           | received intervention (14 month intervention)                                                                                                                                                                                                             | Incentivisation                                                                      |                                                                                                                                                                                                                                                                                                                                                                                                                                                                                                                                                                   |
| Hendricks <sup>31</sup>  | 2009 | USA         | Adults       | Various (Workplace, School and Community) | Description of a project to encourage PA in a small midwestern city. Adults from a city (Jackson, Michigan) were target population (N not reported).                                                                                                      | Environmental restructuring (social and physical)<br><br>Persuasion<br><br>Education | Evaluation not reported.                                                                                                                                                                                                                                                                                                                                                                                                                                                                                                                                          |
| TenBrink <sup>32</sup>   | 2009 | USA         | All          | Community                                 | Evaluation of Project U-Turn. Participants were inhabitants of the City of Jackson; a blue-collar city of 36,000 people in south-central Michigan, located at the crossing of two major highways.                                                         | Education<br><br>Training                                                            | The 2005 study documented a citywide count of 1028 people using active transportation; a year later, this study showed an increase in active transportation of 63%.                                                                                                                                                                                                                                                                                                                                                                                               |
| VanStralen <sup>33</sup> | 2009 | Netherlands | Older Adults | Home                                      | A randomised controlled trial of an environmentally tailored PA intervention for older adults. n=1971 older adults in the Netherlands received intervention (duration: 2 months).<br><br>654 received basic intervention, 737 received intervention plus. | Education<br><br>Modelling                                                           | Mediation analyses showed that changes in cycling, sports and total physical activity behaviour induced by the environmentally tailored intervention were mediated by changes in environmental perceptions. Changes in environmental perceptions did not mediate the effect of the basic tailored intervention on behaviour. Compared with the basic tailored intervention, the environmentally tailored intervention significantly improved cycling behaviour ( $\tau = 30.2$ ). Additionally, the tailored letters of the environmentally tailored intervention |

|                         |      |     |          |           |                                                                                                                                                                                  |                                                                                     |                                                                                                                          |
|-------------------------|------|-----|----------|-----------|----------------------------------------------------------------------------------------------------------------------------------------------------------------------------------|-------------------------------------------------------------------------------------|--------------------------------------------------------------------------------------------------------------------------|
|                         |      |     |          |           |                                                                                                                                                                                  |                                                                                     | were better appreciated and used, although these differences did not mediate the intervention effect. Evaluation n=1977. |
| Cavill <sup>34</sup>    | 2009 | UK  | Adults   | Various   | Evaluation of the Cycling Demonstration Towns project. General public adults target of this intervention.                                                                        | Environmental restructuring (physical and social)<br><br>Training<br><br>Enablement | 25,383 new adult cyclists in 2009 who were not cycling at all in 2006 (from n=714,907 survey respondents)                |
| Geraghty <sup>35</sup>  | 2009 | USA | Children | School    | Evaluation of the Partnership for Active Communities program aiming to increase PA in school children. School children at schools in Sacramento. N not provided.                 | Education                                                                           | Only walking outcomes provided.                                                                                          |
| McCreeedy <sup>36</sup> | 2009 | USA | All      | Community | Description of the Get Active Orlando program: changing the built environment to increase PA. Residents within a community redevelopment area target population. N not provided. | Environmental restructuring (physical and social)<br><br>Persuasion                 | Evaluation not reported                                                                                                  |

|                      |      |     |     |           |                                                                                                                                                                            |                                                                                                                        |                                                                                                                                                                                                                                                                                                                         |
|----------------------|------|-----|-----|-----------|----------------------------------------------------------------------------------------------------------------------------------------------------------------------------|------------------------------------------------------------------------------------------------------------------------|-------------------------------------------------------------------------------------------------------------------------------------------------------------------------------------------------------------------------------------------------------------------------------------------------------------------------|
|                      |      |     |     |           |                                                                                                                                                                            | Enablement                                                                                                             |                                                                                                                                                                                                                                                                                                                         |
| Slovan <sup>37</sup> | 2009 | UK  | All | Community | Overall report of effects of the Cycling Demonstration Towns project on six cycling demonstration towns.                                                                   | Environmental restructuring (physical and social)<br><br>Education<br><br>Training<br><br>Enablement<br><br>Persuasion | Using data from automatic cycle counts, the interim result for the mean increase in cycling levels across all six towns was 27% relative to a 2005 baseline and including data up until March 2009.                                                                                                                     |
| Thomas <sup>38</sup> | 2009 | USA | All | Community | Evaluation of the Bike Walk and Wheel A way of Life program in Columbia, Missouri. Residents in a US city (Columbia) (n not provided). Intervention is one week each year. | Education<br><br>Persuasion<br><br>Incentivisation<br><br>Enablement                                                   | According to a survey of adult graduates conducted 6 weeks after the classes, 75% rode their bicycles more often, 97% felt safer when riding, and 73% reported improved physical fitness since taking the course. In addition, 35% of automobile trips were replaced with bicycle trips among graduates of the classes. |

|                        |      |             |        |           |                                                                                                                                                                                                                                                                                     |                                                                                          |                                                                                                                                                                                                                                                                                                                                      |
|------------------------|------|-------------|--------|-----------|-------------------------------------------------------------------------------------------------------------------------------------------------------------------------------------------------------------------------------------------------------------------------------------|------------------------------------------------------------------------------------------|--------------------------------------------------------------------------------------------------------------------------------------------------------------------------------------------------------------------------------------------------------------------------------------------------------------------------------------|
| O'Fallon <sup>39</sup> | 2010 | New Zealand | Adults | Workplace | Development and preliminary evaluation of Bike Now project: aiming to create sustained participation in cycle commuting. Employees from 27 workplaces across New Zealand. N not provided. 12-month intervention.                                                                    | Training<br>Enablement<br>Modelling<br>Environmental restructuring (social and physical) | Consistent increase in cycling to work in all categories (evaluation n=1567).                                                                                                                                                                                                                                                        |
| O'Fallon <sup>40</sup> | 2010 | New Zealand | Adults | Workplace | Evaluation of Bike Now project. Employees from 40 workplaces in Auckland, Wellington, Nelson and Blenheim (~9500) received intervention                                                                                                                                             | Modelling<br>Environmental restructuring (social and physical)<br>Training<br>Enablement | The number of employees reporting they'd cycled on most days increase from 13% pre intervention to 17% post. The number of people who responded not at all in past 3 months decreased from 66% to 55% (evaluation n=1623)                                                                                                            |
| Rissel <sup>41</sup>   | 2010 | Australia   | Adults | Community | Study described effectiveness of a community-based cycling project: Cycling Connecting Communities. Residents in Fairfield and Liverpool (n=520) were recruited for the intervention, and socio-demographically similar comparison area (Bankstown) residents recruited as control. | Environmental restructuring (social)<br>Education                                        | The telephone survey results showed significantly greater awareness of the Cycling Connecting Communities project (13.5% vs 8.0%, p < 0.05) in the intervention area, with significantly higher rates of cycling in the intervention area (32.9%) compared with the comparison area (9.7%) amongst those aware of the project. There |

|                        |      |             |          |           |                                                                                                                                                                                                                            |                                                                                                      |                                                                                                                                                                                           |
|------------------------|------|-------------|----------|-----------|----------------------------------------------------------------------------------------------------------------------------------------------------------------------------------------------------------------------------|------------------------------------------------------------------------------------------------------|-------------------------------------------------------------------------------------------------------------------------------------------------------------------------------------------|
|                        |      |             |          |           |                                                                                                                                                                                                                            | Training                                                                                             | was a significant increase in use of bicycle paths in the intervention area (28.3% versus 16.2%, $p < 0.05$ ). These findings were confirmed by the bike count data. Evaluation $n=909$ . |
| Cope <sup>42</sup>     | 2010 | UK          | Adults   | Various   | Economic evaluation of cycling demonstration towns project. Various towns included.                                                                                                                                        | Environmental restructuring (physical and social)<br><br>Training<br><br>Education<br><br>Enablement | Data from automatic cycle counters showed increase in cycling levels across all six towns of 27% measured from a 2005 baseline up to March 2009.                                          |
| Mathews <sup>43</sup>  | 2010 | Australia   | Children | School    | The process evaluation of It's Your Move!, an Australian adolescent community-based obesity prevention project. Children from secondary schools in region of Victoria. 3 year project duration.                            | Environmental restructuring (social and physical)                                                    | Evaluation not reported.                                                                                                                                                                  |
| Wen <sup>44</sup>      | 2010 | Australia   | Adults   | Workplace | Findings from a cross-sectional survey investigating the role of workplaces in reducing employees' driving to work. Parents of children taking part in a Central Sydney Walk to School Programme took part in this survey. | Environmental restructuring (physical and social)                                                    | Workplace encouraging active travel were less likely to drive. Facilities and flexible working hours not significant. Evaluation $n=888$ .                                                |
| Ben-Elia <sup>45</sup> | 2011 | Netherlands | Adults   | Home      | A study of commuters' travel behaviour. Rush-hour car commuters with 3 trips a week or more were identified by license plate and approached                                                                                | Persuasion                                                                                           | Participants with a positive attitude to cycling were more likely to change behaviour by not driving (the coefficient for                                                                 |

|                        |      |           |          |                      |                                                                                                                                                         |                                                                                          |                                                                                                                                                                                                                                                                                                                                                                                                                        |
|------------------------|------|-----------|----------|----------------------|---------------------------------------------------------------------------------------------------------------------------------------------------------|------------------------------------------------------------------------------------------|------------------------------------------------------------------------------------------------------------------------------------------------------------------------------------------------------------------------------------------------------------------------------------------------------------------------------------------------------------------------------------------------------------------------|
|                        |      |           |          |                      | by mail. 120 received intervention. 13-week field study.                                                                                                | Incentivisation                                                                          | not driving is positive, $p < 0.001$ )                                                                                                                                                                                                                                                                                                                                                                                 |
| Brockman <sup>46</sup> | 2011 | UK        | Adults   | Workplace            | Study reports results of University of Bristol Staff Travel Survey (n=2829) to investigate the potential health benefits of a workplace transport plan. | Environmental restructuring (social and physical)<br><br>Incentivisation<br><br>Coercion | The percentage of respondents who reported that they usually cycle to work increased from 7% to 12%, but year comparisons with 2007 data failed to reach significance. Over the same period, the percentage of respondents who usually commuted by car decreased from 50% to 33% ( $P < 0.001$ ).                                                                                                                      |
| Buliung <sup>47</sup>  | 2011 | Canada    | Children | School               | A pilot study of a school travel intervention. 12 schools in 4 Canadian provinces involved (n=1489).                                                    | Environmental restructuring (social and physical)<br><br>Education                       | Active transportation increased from 43.8% to 45.9%. Figures on cycling only not reported.                                                                                                                                                                                                                                                                                                                             |
| Burke <sup>48</sup>    | 2011 | Australia | Adults   | Other (Cycle centre) | Individuals who cycle to work in Brisbane, Australia and have purchased a membership with the cycle centre.                                             | Environmental restructuring (physical)                                                   | Prior to existence of Cycle Centre, only 8% reported cycling as their primary mode of transport to work. Now 100% using it as primary source (all participants are members of the cycle centre). 6% of surveyed members shifted mode from the car to bicycle commuting. 73% shifted from public transport to bicycle commuting. These shifts appear to be directly due to the Cycle Centre. Evaluation data from n=44. |

|                          |      |                         |          |                             |                                                                                                                                                       |                                                                                                       |                                                                                                                                             |
|--------------------------|------|-------------------------|----------|-----------------------------|-------------------------------------------------------------------------------------------------------------------------------------------------------|-------------------------------------------------------------------------------------------------------|---------------------------------------------------------------------------------------------------------------------------------------------|
| Hinckson <sup>49</sup>   | 2011 | New Zealand             | Children | School                      | Responses from Children from schools involved in a central and local government funded School Travel Planning programme in Auckland<br><br>(n=22,762) | Education<br><br>Coercion<br><br>Environmental restructuring (physical and social)<br><br>Restriction | Active transport increased by 5.9% from 2004 - 2006 (cycling not reported specifically). Evaluation data from n=13,631.                     |
| Urbanczyk <sup>50</sup>  | 2011 | Various European Cities | Various  | Various                     | Reports from various European cities on cycling promotion efforts.                                                                                    | Environmental restructuring (social)<br><br>Incentivisation<br><br>Education                          | Evaluation not reported                                                                                                                     |
| Børrestad <sup>51</sup>  | 2012 | Norway                  | Children | School                      | Study reports findings of a 12-week intervention to increase cycling in public school pupils. N=26 received intervention.                             | Persuasion                                                                                            | Those who started cycling in intervention had significantly different VO2 max at follow up (51.7mlO2/min/kg vs 47.9 in non-cycling pupils). |
| Chatterjee <sup>52</sup> | 2012 | UK                      | Adults   | Various (School, Community) | Qualitative study sought to obtain explanations for changes in cycling behaviour. Participants were residents of cycling demonstration towns. N       | Persuasion                                                                                            | Theory and preliminary analysis of the interview data were used to develop a conceptual model which hypothesises that                       |

|                           |      |     |          |                                      |                                                                                                                                                                                                                                                                  |                                                   |                                                                                                                                                                                                                                                                                                                                                                                                                                                                                                                                                                                                                                               |
|---------------------------|------|-----|----------|--------------------------------------|------------------------------------------------------------------------------------------------------------------------------------------------------------------------------------------------------------------------------------------------------------------|---------------------------------------------------|-----------------------------------------------------------------------------------------------------------------------------------------------------------------------------------------------------------------------------------------------------------------------------------------------------------------------------------------------------------------------------------------------------------------------------------------------------------------------------------------------------------------------------------------------------------------------------------------------------------------------------------------------|
|                           |      |     |          | & Online)                            | not reported. Study reports findings from 144 face to face interviews.                                                                                                                                                                                           | Training                                          | turning points in travel behaviour are triggered by contextual change.                                                                                                                                                                                                                                                                                                                                                                                                                                                                                                                                                                        |
| Christensen <sup>53</sup> | 2012 | UK  | Adults   | Various (School, Community & Online) | Evaluation of the Cycling Cities and Towns (CTT) program. Residents in CCT locations took part. Interview sample was purposive designed to focus on people that had recently changed their cycling behaviour (started, stopped, increased or decreased cycling). | Persuasion<br>Training                            | Only 15% of cyclists in 'after' survey considered conditions for cycling had deteriorated in program period whereas 85% disagreed. 42% of respondents indicated their level of cycle commuting had increased during the life of the project. It was found in analysing the interviews that three categories of mediating factors played a role in the outcome on cycling behaviour of contextual change. These were intrinsic motivations (for example, increasing physical fitness), facilitating conditions (for example, facilities to store a bicycle at the destination) and personal history (for example, past experience of cycling). |
| Claus <sup>54</sup>       | 2012 | USA | All      | Community                            | Paper describes various approaches to promote cycling by 25 Active Living Design Partnerships.                                                                                                                                                                   | Enablement<br>Training                            | Evaluation not reported                                                                                                                                                                                                                                                                                                                                                                                                                                                                                                                                                                                                                       |
|                           |      | USA | Children | School                               |                                                                                                                                                                                                                                                                  | Environmental restructuring (social)<br>Education | Evaluation not reported                                                                                                                                                                                                                                                                                                                                                                                                                                                                                                                                                                                                                       |
|                           |      | USA | Adults   | Workplace                            |                                                                                                                                                                                                                                                                  | Persuasion                                        | Evaluation not reported                                                                                                                                                                                                                                                                                                                                                                                                                                                                                                                                                                                                                       |



|                            |      |           |          |                                |                                                                                                                                                                                                                                     |                                      |                                                                                                                                                                                                                                               |
|----------------------------|------|-----------|----------|--------------------------------|-------------------------------------------------------------------------------------------------------------------------------------------------------------------------------------------------------------------------------------|--------------------------------------|-----------------------------------------------------------------------------------------------------------------------------------------------------------------------------------------------------------------------------------------------|
|                            |      |           |          |                                |                                                                                                                                                                                                                                     | Education                            |                                                                                                                                                                                                                                               |
|                            |      | USA       | Various  | Various                        |                                                                                                                                                                                                                                     | Persuasion                           | Evaluation not reported                                                                                                                                                                                                                       |
|                            |      | USA       | Various  | Various                        |                                                                                                                                                                                                                                     | Education                            | Evaluation not reported                                                                                                                                                                                                                       |
|                            |      |           |          |                                |                                                                                                                                                                                                                                     | Environmental restructuring (social) |                                                                                                                                                                                                                                               |
| Jariyasunant <sup>55</sup> | 2012 | USA       | Adults   | University                     | Intervention involving personalised travel data feedback. Students and staff at UC Berkeley took part in this 3-week intervention (n=135)                                                                                           | Persuasion                           | Significant change in participants' awareness of statistics related to their travel behaviour, and an intention to drive less amongst the "mainly driving" baseline group. No significant change in levels of cycling. Evaluation data n=121. |
| Crawford <sup>56</sup>     | 2013 | Australia | Children | School                         | A combined impact-process evaluation of a program promoting active transport to school: Ride2School. n=761 children received intervention.                                                                                          | Environmental restructuring (social) | Mode of travel as self-reported by parents was 13.9% at baseline and 15.9% at follow-up, p<0.05 (data from n=358 parents).                                                                                                                    |
|                            |      |           |          |                                |                                                                                                                                                                                                                                     | Education                            |                                                                                                                                                                                                                                               |
|                            |      |           |          |                                |                                                                                                                                                                                                                                     | Incentivisation                      |                                                                                                                                                                                                                                               |
| Dubuy <sup>57</sup>        | 2013 | Belgium   | Adults   | Various (Workplace and Online) | Evaluation of a workplace intervention to promote commuter cycling: a RE-AIM analysis. Participants were employees from twelve small and middle-sized companies in Flanders given an internet-based program. Consideration given to | Environmental restructuring (social) | Difference in general attitude towards cycling between employees aware (3.8 ±0.52) and unaware (3.6 ±0.56) of the program (F= 19.8, p<0.001). Difference in frequency of commuter cycling per week                                            |

|                       |      |         |        |           |                                                                                                                                                                                                                                     |                                                                                                      |                                                                                                                                                                                                                              |
|-----------------------|------|---------|--------|-----------|-------------------------------------------------------------------------------------------------------------------------------------------------------------------------------------------------------------------------------------|------------------------------------------------------------------------------------------------------|------------------------------------------------------------------------------------------------------------------------------------------------------------------------------------------------------------------------------|
|                       |      |         |        |           | companies with staff living 5-10km away from work.                                                                                                                                                                                  | Education<br><br>Incentivisation                                                                     | between employees aware (1.27 ±2.01) and unaware (0.63 ±1.56) of the program (F= 20.57, p<0.001). Evaluation data from n=1116.                                                                                               |
| Goodman <sup>58</sup> | 2013 | UK      | Adults | Community | A longitudinal, controlled natural experiment investigating effectiveness and equity impacts of town-wide cycling initiatives in England. 1.3 million commuters in 18 intervention towns.                                           | Environmental restructuring (physical and social)<br><br>Education<br><br>Training<br><br>Enablement | Found that the prevalence of cycling to work rose from 5.8% in 2001 to 6.8% in 2011. Driving to work decreased. Effects were observed across all fifths of area deprivation, with larger relative changes in deprived areas. |
| Johnson <sup>59</sup> | 2013 | UK      | Adults | Community | A review of the effectiveness of adult cycle training in Tower Hamlets, London. 471 individuals who live, work or study in a densely populated area in London received intervention. 4 individual training sessions of 1 hour each. | Training                                                                                             | Both the frequency (no. days cycling for 30mins) and overall duration of cycling increased by 3 month follow-up. Evaluation data n=130.                                                                                      |
| Bamberg <sup>60</sup> | 2013 | Germany | Adults | Home      | An intervention applying the stage model of self-regulated behavioural change to reduce car use. Participants were recruited from a random sample of 12,000 addresses of Berlin citizens of German nationality obtained from city   | Persuasion<br><br>Education                                                                          | Compared with controls, the standardized effect size of the dialog intervention on motor-car use was 0.51, and on PT use 0.39. The standardized information package did not have a significant effect on either              |

|                          |      |        |          |        |                                                                                                                                                                                                                                                                                                                                                        |                                                                              |                                                                                                                                                                                                                                             |
|--------------------------|------|--------|----------|--------|--------------------------------------------------------------------------------------------------------------------------------------------------------------------------------------------------------------------------------------------------------------------------------------------------------------------------------------------------------|------------------------------------------------------------------------------|---------------------------------------------------------------------------------------------------------------------------------------------------------------------------------------------------------------------------------------------|
|                          |      |        |          |        | administration. Two week intervention.<br>208 received information intervention, 148 received stage-tailored intervention                                                                                                                                                                                                                              |                                                                              | motor-car or PT use. Neither the dialog marketing intervention nor the information package had a significant effect on postintervention cycling and walking. Evaluation data n=291.                                                         |
| Buckley <sup>61</sup>    | 2013 | USA    | Children | School | Evaluation safe routes to school events that designate days for walking and bicycling. Students at two elementary schools in Moscow, Idaho that participate in two designated days for walking and bicycling; "international walk to school day" and "fill the racks". Count data collected for 8 days, also 45 students and 17 parents were surveyed. | Environmental restructuring (social)                                         | Count data revealed substantial increase in active travel on the designated safe routes to schools days (101% increase during the fall event). Data suggests that increased active travel was sustained for at least two weeks after event. |
| Henderson <sup>62</sup>  | 2013 | USA    | Children | School | Description of the Safe Routes to School program in Atlanta (2008-2010). 658 Students at Oak Grove Elementary School (Metropolitan Atlanta) received Safe Routes to School programme.                                                                                                                                                                  | Environmental restructuring (social)<br><br>Education<br><br>Incentivisation | Evaluation not reported                                                                                                                                                                                                                     |
| Lachapelle <sup>63</sup> | 2013 | Canada | Adults   | Home   | Study reports on an early vehicle retirement program in Quebec between 2009 and 2011.                                                                                                                                                                                                                                                                  | Incentivisation                                                              | 42316 program participants provided data during the scrappage scheme<br><br>Only 3.08% of participants chose bicycle or e-scooter rebates.                                                                                                  |

|                         |      |                     |                                      |                   |                                                                                                                                                                                                                         |                                                                                |                                                                                                                                                                                                                                                                                                                                                                                                                           |
|-------------------------|------|---------------------|--------------------------------------|-------------------|-------------------------------------------------------------------------------------------------------------------------------------------------------------------------------------------------------------------------|--------------------------------------------------------------------------------|---------------------------------------------------------------------------------------------------------------------------------------------------------------------------------------------------------------------------------------------------------------------------------------------------------------------------------------------------------------------------------------------------------------------------|
|                         |      |                     |                                      |                   |                                                                                                                                                                                                                         |                                                                                |                                                                                                                                                                                                                                                                                                                                                                                                                           |
| McDonald <sup>64</sup>  | 2013 | USA                 | Children                             | School            | Study reports on the Safe Routes to School Program in Eugene, Oregon.                                                                                                                                                   | Incentivisation<br><br>Education<br><br>Environmental restructuring (physical) | Eugene's SRTS program was associated with increased walking and biking for school travel. Receiving only education and encouragement programs was associated with a nonsignificant increase in walking and a five percentage point increase in biking. SRTS interventions appeared to have a cumulative impact; schools with more types of interventions had larger proportions of students walking and biking to school. |
| Panter <sup>65</sup>    | 2013 | UK                  | Children                             | School            | Longitudinal results from the SPEEDY study. 912 10-year old children recruited from 92 primary schools                                                                                                                  | Environmental restructuring (social and physical)                              | Neither travel plan or high cycling provision were associated with a change to an active commuting mode (evaluation n=912)                                                                                                                                                                                                                                                                                                |
| Bungum <sup>66</sup>    | 2014 | USA                 | Children                             | School            | The effect of an active transport to school intervention at a suburban elementary school. Elementary schools in the state of Nevada.<br><br>N=698 in control school and N=638 in intervention school. Age not reported. | Environmental restructuring (social)<br><br>Persuasion                         | The sole significant difference between the two schools over the 3 data collections, in overall cycling rates, was on NMD, when rates (5% vs.1.9%) were statistically higher at the intervention school. One-week post-event ATS rates returned to baseline levels at both schools.<br><br>Evaluation n=638.                                                                                                              |
| Caulfield <sup>67</sup> | 2014 | Republic of Ireland | All (Children 15+, adults and older) | Other (city-wide) | Investigation into the growth of cycling in Dublin. Consensus data from Dublin (compared to Cork and Galway)                                                                                                            | Incentivisation<br><br>Environmental                                           | In Dublin, cycling made up 5% of modal share in 2011 compared with only 4% in 2006, whereas there was no change in Cork or Galway (control cities). Evaluation data                                                                                                                                                                                                                                                       |

|                            |      |         |                                                   |        |                                                                                                                                                                                                                                                                                              |                                                                   |                                                                                                                                                                                                                                                                                                          |
|----------------------------|------|---------|---------------------------------------------------|--------|----------------------------------------------------------------------------------------------------------------------------------------------------------------------------------------------------------------------------------------------------------------------------------------------|-------------------------------------------------------------------|----------------------------------------------------------------------------------------------------------------------------------------------------------------------------------------------------------------------------------------------------------------------------------------------------------|
|                            |      |         | adults)                                           |        | Dublin N=511,760, Cork n=197,772, Galway N=93,380.                                                                                                                                                                                                                                           | restructuring (social)                                            | n=511,760.                                                                                                                                                                                                                                                                                               |
| Christiansen <sup>68</sup> | 2014 | Denmark | Children                                          | School | Effects of a Danish multicomponent physical activity intervention on active school transport (Sport Active transport Club fitness and Environment – SPACE - study). Adolescents from 14 schools in Region of Southern Denmark<br><br>N=1014 total. Mean age 12.6 years. 2-year intervention. | Environmental restructuring (social and physical)<br><br>Training | No significant effects on outcomes. Evaluation data n=1060.                                                                                                                                                                                                                                              |
| Ducheyne <sup>69</sup>     | 2014 | Belgium | Children                                          | School | Effects of a cycle training course on children's cycling skills and levels of cycling to school. Random sample from five primary schools in Flanders, Belgium<br><br>n=135, mean age 9.3 years, 4-week intervention.                                                                         | Training                                                          | Children's total cycling skill score increased significantly more from pre to post and from pre to 5-months follow-up in the intervention group than in the control group. No significant intervention effects were found on children's cycling to school levels and parental attitudes towards cycling. |
| Gutierrez <sup>70</sup>    | 2014 | USA     | Children (behavior)<br>Adults (parent perception) | School | Investigation into the effects of crossing guard presence on active transport and injury prevention. Participants recruited via elementary schools in Miami                                                                                                                                  | Environmental restructuring (social)<br><br>Education             | No significant change in child AT trends from pre to post-controlling for other variables. No improvements in parent concerns or attitudes towards active travel.<br><br>Evaluation n=702.                                                                                                               |

|                          |      |             |         |           |                                                                                                                                                                                                                                                                               |                                                                           |                                                                                                                                                                                                                                                    |
|--------------------------|------|-------------|---------|-----------|-------------------------------------------------------------------------------------------------------------------------------------------------------------------------------------------------------------------------------------------------------------------------------|---------------------------------------------------------------------------|----------------------------------------------------------------------------------------------------------------------------------------------------------------------------------------------------------------------------------------------------|
|                          |      |             |         |           |                                                                                                                                                                                                                                                                               |                                                                           |                                                                                                                                                                                                                                                    |
| Hamre <sup>71</sup>      | 2014 | USA         | Adults  | Workplace | Investigation into commuter mode choices in Washington DC. 2007/2008 DC Household Travel Survey conducted by the Metropolitan Washington Council of Governments' (MWCOC) Transportation Planning Board.                                                                       | Environmental restructuring (physical)                                    | Commuters offered either public transportation benefits, showers/lockers, or bike parking, but no free car parking, are more likely to either ride public transportation, walk, or cycle to work (n=4630)                                          |
| Chapman <sup>72</sup>    | 2014 | New Zealand | All     | Community | Results of a quasi-experimental study of an intervention to encourage walking and cycling. All household members of 10 years of age in different cities - respondents to ACTIVE survey and NZ travel survey.                                                                  | Education<br><br>Persuasion<br><br>Environmental restructuring (physical) | Findings from this study reported in Keall [86].                                                                                                                                                                                                   |
| Lanzendorf <sup>73</sup> | 2014 | Germany     | Various | Various   | Empirical evidence for successful cycling campaigns in Germany. (Berlin, Hamburg, Frankfurt and Munich).                                                                                                                                                                      | Education                                                                 | Conclusion: Both cycling infrastructure improvements and communication campaigns initiated, supported and executed by the local government are key factors for increasing bicycle use in cities.                                                   |
| Norwood <sup>74</sup>    | 2014 | UK          | Adults  | Various   | Evaluation of an active travel intervention: Smarter Choices, Smarter Places. Implementation of SCSP was restricted to seven local areas with populations ranging between 8 and 39 thousand (Barrhead, Dumfries, Dundee, Glasgow East End, Kirkintilloch/Lenzie, Kirkwall and | Education<br><br>Persuasion                                               | The results suggest that the initiative impacted positively on the likelihood of physical activity participation and meeting the recommended physical activity guidelines. Individuals in the intervention areas were on average 6% more likely to |

|                       |      |           |                  |           |                                                                                                                                                                                                                                                                                                                                         |                                              |                                                                                                                                                                                                                                                                                                                                                                                                                                                                                                                                           |
|-----------------------|------|-----------|------------------|-----------|-----------------------------------------------------------------------------------------------------------------------------------------------------------------------------------------------------------------------------------------------------------------------------------------------------------------------------------------|----------------------------------------------|-------------------------------------------------------------------------------------------------------------------------------------------------------------------------------------------------------------------------------------------------------------------------------------------------------------------------------------------------------------------------------------------------------------------------------------------------------------------------------------------------------------------------------------------|
|                       |      |           |                  |           | Larbert/Stenhousemuir). 7226 received intervention.                                                                                                                                                                                                                                                                                     | Training                                     | meet the physical activity guidelines compared to individuals in the non intervention areas. However, the absolute prevalence of physical activity participation declined in both intervention and control areas over time. Evaluation n=9542.                                                                                                                                                                                                                                                                                            |
| Rissel <sup>75</sup>  | 2014 | Australia | Adults           | Community | Evaluation of the impact of a national cycling skills program (AustCycle). Registered participants of AustCycle<br><br>N=2250 provided demographic and cycling behavior data, majority 45-59 years bracket<br><br>Overall 1216 AustCycle programs were conducted between July 2010 and June 2013, with approximately 6700 participants. | Training                                     | Over 91% of participants highly rating their AustCycle experience. Statistically significant improvements in cycling skills and confidence at three months, and small but statistically significant reductions in weight and body mass index (BMI) at three and 12 months. There was a statistically significant association between lower BMI and total minutes cycled in the past week at the three month follow-up, after adjustment for age, sex other physical activity. Evaluation n=423 at 3 month and n=125 at 12month follow-up. |
| Bothos <sup>76</sup>  | 2014 | Austria   | Adults           | Home      | Intervention using persuasive strategies and choice architecture to encourage sustainable transport. Adults from metropolitan area of Vienna, Austria, in summer of 2013. All participants had Android phones with software to allow the app to be installed. N=24.<br><br>8 weeks                                                      | Education<br><br>Persuasion                  | Cyclists and public transport users searched significantly more often for specific routes than did car users. Behaviour change was small and limited to short-term effects. This can partly be attributed to the application used being work-in-progress.                                                                                                                                                                                                                                                                                 |
| DelDuca <sup>77</sup> | 2014 | Brazil    | Teens and Adults | School    | Effectiveness of physical activity indicators of an intervention delivered to high school students. High school students in Recife and Florianopolis baseline n=2155, 10 month intervention.                                                                                                                                            | Education<br><br>Environmental restructuring | In comparison to the control group, the intervention group significantly increased the practice of active commuting to school on >1 day a week (80.5% vs 86.8%, P<0.001) and >5 days per week (64.3% vs 71.9%,                                                                                                                                                                                                                                                                                                                            |

|                         |      |     |          |           |                                                                                                                                                                                                                                                                                                                                                                        |                                                                                                                    |                                                                                                                                                                                                                                                                                |
|-------------------------|------|-----|----------|-----------|------------------------------------------------------------------------------------------------------------------------------------------------------------------------------------------------------------------------------------------------------------------------------------------------------------------------------------------------------------------------|--------------------------------------------------------------------------------------------------------------------|--------------------------------------------------------------------------------------------------------------------------------------------------------------------------------------------------------------------------------------------------------------------------------|
|                         |      |     |          |           |                                                                                                                                                                                                                                                                                                                                                                        | (physical)                                                                                                         | p<0.001). Evaluation n=989.                                                                                                                                                                                                                                                    |
| Engelberg <sup>78</sup> | 2014 | USA | All      | Community | <p>Ciclovia Participation and Impacts in San Diego, CA: The First CiclosDias. Residents and visitors of San Diego, CA.</p> <p>N=8,311 attended the event. One day event.</p> <p>Comprehensive evaluation consisted of city-wide survey 1 week before and after event (n=805), counts of event attendees, surveys of event attendees (n=713), and businesses (n=26)</p> | <p>Environmental restructuring (social and physical)</p> <p>Enablement</p> <p>Education</p> <p>Incentivisation</p> | <p>Direct observations indicated 85% of attendees were cycling, 15% were walking. 97% of attendees met the 30 min/day guideline, and 39% met the 150 min/week guideline during the event alone. 27% of attendees reported they would have been inactive without the event.</p> |
| Hoffman <sup>79</sup>   | 2014 | USA | Children | Community | <p>Experiences and perceptions of urban youths of a community cycling initiative Earn-A-Bike. Youths who took part in the first four Neighbourhood Bike Works Earn-A-Bike classes offered at the Bike Salon in Philadelphia, PA</p> <p>n=32, 7-14 children (mean age 10.21)</p> <p>Qualitative focus groups with participants of the programme</p>                     | <p>Enablement</p> <p>Environmental restructuring (social)</p>                                                      | <p>The programme was well accepted by urban youth who reported positive perceptions and intentions to continue cycling after the conclusion of the programme.</p>                                                                                                              |
| Kinton <sup>80</sup>    | 2014 | USA | All      | Community | <p>Description of the Walk or Ride, Get Moving San Antonio "Ride to Own" program. Residents of San Antonio</p>                                                                                                                                                                                                                                                         | <p>Education</p> <p>Environmental</p>                                                                              | <p>Evaluation not reported</p>                                                                                                                                                                                                                                                 |



|                        |      |     |          |           |                                                                                                                                                                                                        |                                                                                                                              |                                                                                                                                                 |
|------------------------|------|-----|----------|-----------|--------------------------------------------------------------------------------------------------------------------------------------------------------------------------------------------------------|------------------------------------------------------------------------------------------------------------------------------|-------------------------------------------------------------------------------------------------------------------------------------------------|
|                        |      |     |          |           | 300 received new bikes                                                                                                                                                                                 | restructuring (social)<br><br>Incentivisation                                                                                |                                                                                                                                                 |
| Nordback <sup>81</sup> | 2014 | USA | Adults   | Workplace | Investigation into traffic reduction as a result of a cycling event. Workers taking part in a bike to work day in community in city.                                                                   | Environmental restructuring (social)                                                                                         | Bike volume on the days of these events is typically double than comparable workdays and a reduction in motor vehicle traffic is also evidence. |
| Stewart <sup>82</sup>  | 2014 | USA | Children | School    | Multistate Evaluation of Safe Routes to School Programs. Pupils from schools affected by a completed SRTS programme                                                                                    | Environmental restructuring (physical and social)<br><br>Persuasion<br><br>Incentivisation<br><br>Training<br><br>Enablement | Bicycling increased by 24% (from 2.5-3%) at 50 schools                                                                                          |
| Chandler <sup>83</sup> | 2015 | USA | Children | School    | Evaluation of a community based after school program promoting bicycling skills and knowledge: 'Kids Can Bike!'. 3rd to 5th graders already enrolled in afterschool programme in Knoxville, Tennessee. | Enablement<br><br>Education                                                                                                  | Significant increase in bicycling safety and skill knowledge $p < 0.001$ (n=69)                                                                 |

|                      |      |        |                         |           |                                                                                                                                                                                                                                                                                              |                                                                    |                                                                                                                                                                                                                                                                                                                     |
|----------------------|------|--------|-------------------------|-----------|----------------------------------------------------------------------------------------------------------------------------------------------------------------------------------------------------------------------------------------------------------------------------------------------|--------------------------------------------------------------------|---------------------------------------------------------------------------------------------------------------------------------------------------------------------------------------------------------------------------------------------------------------------------------------------------------------------|
|                      |      |        |                         |           | 7 week intervention.                                                                                                                                                                                                                                                                         | Environmental restructuring (social)<br><br>Training               |                                                                                                                                                                                                                                                                                                                     |
| Diniz <sup>84</sup>  | 2015 | Brazil | Adults and Older Adults | Workplace | Results of an educational intervention to improve active commuting. Workers from a metallurgical industry drawn through a random systematic sampling<br><br>n=464 intervention group, n=468 control group. 6 month intervention.                                                             | Education<br><br>Incentivisation                                   | The proportion of participants that used bicycles to commute to work (IG) increased significantly from baseline (45.3%) to the final interventional period (47.5%). No difference was found between the CG and the IG group after the interventional period (evaluation n=932)                                      |
| Fyhri <sup>85</sup>  | 2015 | Norway | Adults                  | Community | Effects of e-bikes on bicycle use and mode share. Members of the Norwegian Automobile Federation (NAF)                                                                                                                                                                                       | Enablement                                                         | E-bike cycling trips increased from 0.9 to 1.4 per day, distance from 4.8 km to 10.3 km and, as a share of all transport, from 28% to 48%, whereas with the control group there was no increase in cycling.<br><br>(evaluation n=593)                                                                               |
| Gamble <sup>86</sup> | 2015 | UK     | Adults                  | Online    | Bicycling campaigns promoting health versus campaigns promoting safety: A randomized controlled online study of 'dangerization'. Respondents were recruited opportunistically through social media (Facebook and Twitter), and on the University of Bath homepage and electronic Noticeboard | Education<br><br>Environmental restructuring (physical and social) | The study suggests that safety-focused campaigns are unlikely to have any immediate effect on people's perceptions and intentions to cycle, whether positive or negative; health-focused campaigns, on the other hand, make bicycling appear more beneficial to those who do not currently do it. Evaluation n=228. |

|                          |      |             |          |           |                                                                                                                                                                                                                                       |                                                                           |                                                                                                                                                                                                                                                                                                                                                                                                                                                    |
|--------------------------|------|-------------|----------|-----------|---------------------------------------------------------------------------------------------------------------------------------------------------------------------------------------------------------------------------------------|---------------------------------------------------------------------------|----------------------------------------------------------------------------------------------------------------------------------------------------------------------------------------------------------------------------------------------------------------------------------------------------------------------------------------------------------------------------------------------------------------------------------------------------|
|                          |      |             |          |           |                                                                                                                                                                                                                                       | Training                                                                  |                                                                                                                                                                                                                                                                                                                                                                                                                                                    |
| Keall <sup>87</sup>      | 2015 | New Zealand | All      | Community | Increasing active travel: results of a quasi-experimental study of an intervention to encourage walking and cycling. All household members of 10 years of age in different cities - respondents to ACTIVE survey and NZ travel survey | Education<br><br>Persuasion<br><br>Environmental restructuring (physical) | 37% increased odds of active travel versus other modes in intervention cities compared to control (no cycling specific models) (evaluation n=283).                                                                                                                                                                                                                                                                                                 |
| Ostergaard <sup>88</sup> | 2015 | Denmark     | Children | School    | Effectiveness and implementation of interventions to increase commuter cycling to school: a quasi-experimental study. Students from public schools in 3 different regions in Denmark (Copenhagen, Fredericia, and Funen) n=2415       | Training<br><br>Incentivisation                                           | No significant differences in commuter cycling were detected in the adjusted analyses comparing the intervention with the control group neither when assessed as changes in short term, nor when assessed as changes in long term school cycling. No differences were observed neither in the incidence of traffic injuries nor in the characteristics of injuries when comparing the control group and the intervention group. Evaluation n=2401. |
| Petrunoff <sup>89</sup>  | 2015 | Australia   | Adults   | Workplace | Comparison of approaches to workplace travel plans using disincentives for driving and incentives for active travel Staff from two                                                                                                    | Restriction                                                               | It was found that there was a 42% reduction in driving alone amongst QEII Medical Centre staff or a 5% reduction in driving alone amongst Hollywood Private                                                                                                                                                                                                                                                                                        |

|                              |      |        |          |             |                                                                                                                                                                                        |                                                               |                                                                                                                                                                                                                                                                                                           |
|------------------------------|------|--------|----------|-------------|----------------------------------------------------------------------------------------------------------------------------------------------------------------------------------------|---------------------------------------------------------------|-----------------------------------------------------------------------------------------------------------------------------------------------------------------------------------------------------------------------------------------------------------------------------------------------------------|
|                              |      |        |          |             | adjoining hospitals in Perth, Western Australia<br>n=1041 at site 1 and 445 at site 2. Ongoing, but evaluation compared 2009 data with 2012 data.                                      | Coercion<br><br>Training<br><br>Enablement                    | Hospital staff. The 37% difference in the reduction of staff driving to work alone at the two sites was significant.                                                                                                                                                                                      |
| Villa-Gonzalez <sup>90</sup> | 2015 | Spain  | Children | School      | Effectiveness of an active commuting school-based intervention at 6-month follow-up. 8-11 year olds from 5 primary schools were invited. n=206 children ages 8–11. Duration: 6 months. | Persuasion<br><br>Education<br><br>Incentivisation            | There was a significant difference in the change of number of walk and bike travels per week between groups at 6-month follow-up. Regarding the frequency of mode of commuting, only a change in walking to school was significantly different between the groups at 6-month follow-up. Evaluation n=206. |
| Poslad <sup>91</sup>         | 2015 | Europe | Adults   | Other - app | Intervention using Smart City Internet of Things (IoT) software to incentivise shifts in mobility behaviour. Volunteers recruited via adverts and social media in 3 European cities    | Incentivisation<br><br>Persuasion                             | It is feasible to induce public transport users to change to cycling.                                                                                                                                                                                                                                     |
| Bike League <sup>92</sup>    | 2015 | USA    | Various  | Various     | Descriptions of small cycling promotion projects from communities New York City.                                                                                                       | Environmental restructuring (physical)<br><br>Incentivisation | Evaluation not reported                                                                                                                                                                                                                                                                                   |

|                         |      |           |          |           |                                                                                                                                                                                                                                                 |                                         |                                                                                                                                                                                                                                                                                                                                                                       |
|-------------------------|------|-----------|----------|-----------|-------------------------------------------------------------------------------------------------------------------------------------------------------------------------------------------------------------------------------------------------|-----------------------------------------|-----------------------------------------------------------------------------------------------------------------------------------------------------------------------------------------------------------------------------------------------------------------------------------------------------------------------------------------------------------------------|
| Behrendt <sup>93</sup>  | 2016 | UK        | Adults   | Workplace | Investigation into potential impacts of e-bikes on travel behaviour. Commuters in Brighton - 80 employees were loaned e-bikes<br><br>6-8 weeks                                                                                                  | Enablement<br><br>Training              | Evaluation not reported                                                                                                                                                                                                                                                                                                                                               |
| Coombes <sup>94</sup>   | 2016 | UK        | Children | School    | A pilot evaluation of the Beat the Street physical activity intervention. Children from schools in Norwich<br><br>n=51 received intervention, 8-10 year olds. Intervention school was 62.7% female, control school 41.4% female.<br><br>9 weeks | Incentivisation                         | Significantly higher increase in MVPA between baseline and post-intervention in intervention school compared to control school (evaluation n=80).                                                                                                                                                                                                                     |
| Goodman <sup>95</sup>   | 2016 | UK        | Children | School    | Impact of offering cycle training in schools upon cycling behaviour. Children participating in the nationally-representative Millennium Cohort Study<br><br>N=2563 Intervention group, N=773 control group.                                     | Training                                | Children whose school had offered Bikeability were much more likely to have completed cycle training than the control group (68 % vs. 28 %, p < 0.001). There was, however, no evidence that delivering Bikeability in school was associated with cycling more often. There was likewise no evidence of an association with cycling independently. Evaluation n=3336. |
| Millonig <sup>96</sup>  | 2016 | USA       | Adults   | Workplace | Evaluation of a corporate cycling campaign: Biking Tourney. Employees recruited from 14 different companies in Boston, MA.<br><br>N=239, 81% male, age not reported.<br><br>6 weeks                                                             | Incentivisation                         | Quantitative results based on an ex-post survey (n=129) show that during the tourney 15% of participants biked more often than usual. More than 19% of the tourney participants planned to bike more often even after the tourney ended                                                                                                                               |
| Petrunoff <sup>97</sup> | 2016 | Australia | Adults   | Workplace | Effects of a workplace travel plan intervention encouraging active travel to work: outcomes from a three-year time-series study. Hospital staff from                                                                                            | Environmental restructuring (social and | The proportion of staff travelling actively to work increased by 4%--6% across intervention years compared to the                                                                                                                                                                                                                                                     |

|                      |      |    |          |                                    |                                                                                                                                                                                                                                                                                                                                      |                                            |                                                                                                                                                                                                                                                                                                                                                                                                                                                              |
|----------------------|------|----|----------|------------------------------------|--------------------------------------------------------------------------------------------------------------------------------------------------------------------------------------------------------------------------------------------------------------------------------------------------------------------------------------|--------------------------------------------|--------------------------------------------------------------------------------------------------------------------------------------------------------------------------------------------------------------------------------------------------------------------------------------------------------------------------------------------------------------------------------------------------------------------------------------------------------------|
|                      |      |    |          |                                    | a large outer-suburban worksite. Ongoing, comparison of data from 2011, 2012, 2013 and 2014                                                                                                                                                                                                                                          | physical)<br><br>Training<br><br>Education | baseline, and this increase was significant in 2012 and 2013. Compared to baseline, after adjusting for distances staff lived from work staff had 33% greater odds of travelling to work via active modes in 2012, and 50% greater odds in 2013. Evaluation data from n=804 in 2011, n=904 in 2012, n=872 in 2013, n=682 in 2014.                                                                                                                            |
| Teyhan <sup>98</sup> | 2016 | UK | Children | School                             | Impact of a cycle proficiency training program (National Cycle Proficiency Scheme – now known as Bikeability) on cycle-related behaviours and accidents in adolescents. Participants in the Avon Longitudinal Study of Parents and Children who reported whether or not they had received NCPS training. 5415 received intervention. | Training                                   | Trained children were more likely to cycle to school and to own a cycle helmet at both 14 and 16 years, to have worn a helmet on their last cycle at age 14, and to have worn high-visibility clothing at age 16, than those who had not attended a course. NCPS training was not associated with self-reported involvement in a cycle accident.                                                                                                             |
| Uttley <sup>99</sup> | 2016 | UK | Adults   | Various (Workplace and University) | A case study from the university of Sheffield investigating long-term behavioural change as a result of cycling promotion schemes (the Cycle Challenge). Students and staff at the University of Sheffield (n=488) participants who took part in either 2009 or 2010 challenge                                                       | Incentivisation                            | Cycling behavior was recorded before the Cycle Challenge and two years after the scheme's completion. It was found that seventy five percent of participants who were not already regular cyclists reported increased cycling, yet the overall impact of this shift was limited because the majority of participants already cycled regularly. This failure to attract new cyclists suggests recruiting non-cyclists should be a priority in future schemes. |

|                                |      |             |                     |            |                                                                                                                                                                                                                                                                                                                                    |                                                        |                                                                                                                                                                                                                                                                                   |
|--------------------------------|------|-------------|---------------------|------------|------------------------------------------------------------------------------------------------------------------------------------------------------------------------------------------------------------------------------------------------------------------------------------------------------------------------------------|--------------------------------------------------------|-----------------------------------------------------------------------------------------------------------------------------------------------------------------------------------------------------------------------------------------------------------------------------------|
| Ang-Olson <sup>100</sup>       | 2016 | USA         | Adults and Children | Community  | Evaluation of the Metropolitan transportation Commission's Climate Initiatives Program. Residents of the San Francisco Bay area<br><br>N not reported. Actions took place over 4 years.                                                                                                                                            | Enablement<br><br>Education                            | Evaluation not reported.                                                                                                                                                                                                                                                          |
| Castellanos <sup>101</sup>     | 2016 | Colombia    | Adults              | Online     | Field study example of delivering modal-shift incentives using gamification and smartphones. Commuters in the city of Bogota (Colombia) received 2 week intervention. N=40.                                                                                                                                                        | Education<br><br>Incentivisation                       | 30 cycling trips recorded in week 2 compared to 9 in week 1. However, Mean distance cycled was not significantly different between weeks 1 and 2. Suggests cycling didn't actually increase, but that participants were just more likely to log their trips with the incentive.   |
| Chaston <sup>102</sup>         | 2016 | UK          | Young adults        | University | Evaluation of the Higher Education recreational pilot 'Ride Social'. Higher education students from universities who had applied for Sport England's University Sport Activation fund (USAF).<br><br>10 months.<br><br>Only two universities (Leeds and Plymouth) carried out group rides through Ride Social in this pilot, n=224 | Environmental restructuring (social)<br><br>Persuasion | Reasons for not participating in group rides included that they were too busy or did not have enough support. Most successful rides were those linked with other initiatives, for example Kent University did a 'ride to the coast to get fish & chips' that had 20 participants. |
| CyclingScotland <sup>103</sup> | 2016 | UK          | Multiple            | Multiple   | Case studies to help demonstrate where positive progress is being made to get more people cycling more often in more places in Scotland.                                                                                                                                                                                           | Training                                               | Cycling levels are significantly increased but statistical data and stakeholder views indicate that the 10% vision is unlikely to be achieved by 2020.                                                                                                                            |
| Harms <sup>104</sup>           | 2016 | Netherlands | All                 | Online     | Investigation into performance of Municipal Cycling Policies in medium sized cities in the Netherlands since 2000. Residents from medium sized cities in the Netherlands - respondents to                                                                                                                                          | Environmental restructuring (physical)                 | Providing adequate cycling infrastructure and reducing attractiveness of car use seem to be key drivers                                                                                                                                                                           |

|                          |      |          |          |             |                                                                                                                                                                                                                                                                   |                                                                                                      |                                                                                                                                                                                                                             |
|--------------------------|------|----------|----------|-------------|-------------------------------------------------------------------------------------------------------------------------------------------------------------------------------------------------------------------------------------------------------------------|------------------------------------------------------------------------------------------------------|-----------------------------------------------------------------------------------------------------------------------------------------------------------------------------------------------------------------------------|
|                          |      |          |          |             | the Dutch National Travel Survey (online)                                                                                                                                                                                                                         |                                                                                                      |                                                                                                                                                                                                                             |
| Hidalgo <sup>105</sup>   | 2016 | Colombia | Children | School      | Description of a bike to school program: Al Colegio en Bici. Children from 74 schools in 6 districts in Bogota, Colombia<br><br>n=3194 pupils, 19% girls 81 boys, age info not provided. Participating schools mainly located in low-income and peripheral areas. | Education<br><br>Environmental restructuring (social and physical)<br><br>Enablement<br><br>Training | Launch of programme can be considered successful as it's providing a fun, safe and sustainable way to access school for more than 3,000 public school students.                                                             |
| Semanjski <sup>106</sup> | 2016 | Belgium  | Adults   | Other - app | Intervention involving mobile sensing and incentivised targeted shifts in mobility behaviour. Volunteers who registered on a dedicated web portal and downloaded an app<br><br>6 months<br><br>N=3400 received intervention                                       | Incentivisation<br><br>Persuasion                                                                    | The majority of participants kept old behaviours and typically less than 10% took a new suggestion                                                                                                                          |
| Swift <sup>107</sup>     | 2016 | UK       | Adults   | Workplace   | Impact of the Cycle to Work Scheme. Cycle to work scheme users who chose to respond to the survey. N not reported.                                                                                                                                                | Incentivisation<br><br>Enablement                                                                    | 66% respondents reported that they cycled more since joining the scheme - greater proportion of new and occasional cyclists reported cycling more (i.e., new journeys) than enthusiastic cyclists (maintenance of journeys) |



|                          |      |         |                         |           |                                                                                                                                                                                                                                                                                                                                  |                                                                                                                |                                                                                                                                                                                                                                                                                                                                      |
|--------------------------|------|---------|-------------------------|-----------|----------------------------------------------------------------------------------------------------------------------------------------------------------------------------------------------------------------------------------------------------------------------------------------------------------------------------------|----------------------------------------------------------------------------------------------------------------|--------------------------------------------------------------------------------------------------------------------------------------------------------------------------------------------------------------------------------------------------------------------------------------------------------------------------------------|
|                          |      |         |                         |           |                                                                                                                                                                                                                                                                                                                                  |                                                                                                                |                                                                                                                                                                                                                                                                                                                                      |
| VanLierop <sup>108</sup> | 2016 | Canada  | Children                | School    | Evaluation of a bicycle education program for children in Quebec. Pupils from schools taking part in the CCA Education programme<br><br>N=153                                                                                                                                                                                    | Education<br><br>Training<br><br>Environmental restructuring (social)                                          | Children's knowledge of bicycle safety increased. Children became more confident. Cycling abilities increased. Evaluation n =51.                                                                                                                                                                                                     |
| Aittasalo <sup>109</sup> | 2017 | Finland | Adults                  | Workplace | Large workplaces in Tampere<br><br>Area 1: n=910, mean age 44.5 (32.3). Area 2: n=230, mean age 44.1(11.4).<br><br>1642 received accelerometers.                                                                                                                                                                                 | Environmental restructuring (social)                                                                           | Evaluation not reported                                                                                                                                                                                                                                                                                                              |
| Bernstein <sup>110</sup> | 2017 | USA     | Adults and Older Adults | Community | Results of a pilot randomised controlled trial examining the impact of a bicycling intervention on lower-income adults. Participants included members from 1 largely Latino community and a second primarily African American neighbourhood in Milwaukee, Wisconsin. Recruited using flyers at community events.<br><br>12 weeks | Education<br><br>Environmental restructuring (social)<br><br>Training<br><br>Enablement<br><br>Incentivisation | Bicycling for leisure or non-work transportation increased significantly more in the intervention than control group from baseline to 12 weeks but this difference attenuated by 20 weeks. Both groups increased their fitness between baseline and 12 weeks, with a trend towards greater gains in the bicycling intervention group |

|                         |      |           |                         |           |                                                                                                                                                                                                                                                                                                                                          |                            |                                                                                                                                                                                                                                           |
|-------------------------|------|-----------|-------------------------|-----------|------------------------------------------------------------------------------------------------------------------------------------------------------------------------------------------------------------------------------------------------------------------------------------------------------------------------------------------|----------------------------|-------------------------------------------------------------------------------------------------------------------------------------------------------------------------------------------------------------------------------------------|
| Blake <sup>111</sup>    | 2017 | UK        | Adults and Older Adults | Workplace | Evaluation of a technology based intervention to promote PA in hospital employees (Active8!). Hospital employees recruited via email, posters and notice boards.<br><br>N=296, mean age 38.78 years. Duration: 12 weeks.                                                                                                                 | Persuasion                 | Increase in duration and frequency of active travel from baseline to 16 weeks. Does not distinguish between walking and cycling.                                                                                                          |
| Cairns <sup>112</sup>   | 2017 | UK        | Adults                  | Workplace | Potential impact of ebikes on travel behaviour. Commuters in Brighton<br><br>n=80, 6-8 week intervention.                                                                                                                                                                                                                                | Enablement<br><br>Training | Average miles driven in car decreased from 54 to 43. Mean time spent cycling increased from 47 minutes to 132 minutes. Qualitative participant interviews revealed that bikes were perceived as faster and more enjoyable than car.       |
| Fyhri <sup>113</sup>    | 2017 | Norway    | Adults                  | Community | Investigation into the role of ebikes in overcoming barriers to bicycle use. Randomly selected respondents from a convenience sample among car owners - cross-sectional data collection via internet questionnaire asking about perceptions of cycling<br><br>N=66 in intervention group, N=214 in control group. 2-4 week intervention. | Enablement                 | Following intervention, those who had been loaned eBike were significantly more likely to report being willing to pay extra for an eBike compared to control group (41% increase compared to 15% increase).<br><br>Evaluation data n=280. |
| Hatfield <sup>114</sup> | 2017 | Australia | Children                | School    | Evaluation of a cycling education program: Safe Cycle. Recruited from 4 schools in Canberra, Australia<br><br>n=12; duration: 8 weeks.                                                                                                                                                                                                   | Education<br><br>Training  | No evidence that Safe Cycle changed riding behaviour                                                                                                                                                                                      |
| Ho <sup>115</sup>       | 2017 | Australia | Adults                  | Community | A case study of Rouse Hill Town Centre evaluating area-wide travel plans. Residents from a new subregional development (1800 new dwellings)                                                                                                                                                                                              | Enablement                 | Awareness was almost zero for all actions. Likelihood to take part in next 12 months was around 30%.                                                                                                                                      |

|                        |      |         |          |        |                                                                                                                                                                                                                                                                                                                                    |                                                                                               |                                                                                                                                                                                                                                                                                                                                                              |
|------------------------|------|---------|----------|--------|------------------------------------------------------------------------------------------------------------------------------------------------------------------------------------------------------------------------------------------------------------------------------------------------------------------------------------|-----------------------------------------------------------------------------------------------|--------------------------------------------------------------------------------------------------------------------------------------------------------------------------------------------------------------------------------------------------------------------------------------------------------------------------------------------------------------|
|                        |      |         |          |        | N=378.                                                                                                                                                                                                                                                                                                                             | Environmental restructuring (social)<br><br>Education                                         |                                                                                                                                                                                                                                                                                                                                                              |
| Lambe <sup>116</sup>   | 2017 | Ireland | Children | School | Evaluation of a natural experiment to improve active travel to primary school in Ireland. 5th and 6th grade primary school students from 21 primary schools<br><br>N=743 intervention town 1, n=295 intervention town 2, n=419 control town.                                                                                       | Persuasion<br><br>Training<br><br>Environmental restructuring (social)<br><br>Incentivisation | There was no evidence from this study that the community-wide interventions were effective in increasing active travel in the overall sample of students. Evaluation n=1457.                                                                                                                                                                                 |
| Mendoza <sup>117</sup> | 2017 | USA     | Children | School | A pilot cluster randomised controlled trial of a Bicycle Trains program. Fourth and fifth graders from four different public schools serving low income families in Seattle<br><br>n=54, mean age intervention group was 9.8, mean age control group 10. intervention group 54% female, control group 73.3% female.<br><br>6 weeks | Environmental restructuring (social)<br><br>Training<br><br>Enablement                        | For two separate adjusted repeated measures linear mixed effects models in which students were nested within schools, intervention participants had: (1) an absolute increase in mean percentage of daily commutes by cycling of 44.9%, and (2) an increase in mean MVPA of 21.6 minutes/day, from Time 1 to Time 2 compared with controls. Evaluation n=54. |

|                       |      |    |                     |         |                                                                                                            |                                                                          |                                                                                                                                                                                                                                                                                                                                                                                                                                                                                                                                                                                                                   |
|-----------------------|------|----|---------------------|---------|------------------------------------------------------------------------------------------------------------|--------------------------------------------------------------------------|-------------------------------------------------------------------------------------------------------------------------------------------------------------------------------------------------------------------------------------------------------------------------------------------------------------------------------------------------------------------------------------------------------------------------------------------------------------------------------------------------------------------------------------------------------------------------------------------------------------------|
| Sloman <sup>118</sup> | 2017 | UK | Adults              | Various | Details of the Barnsley, Doncaster, Rotherham and Sheffield (BDRS) (sustainable journey to work) programme | Environmental restructuring (physical)<br><br>Training<br><br>Enablement | 7 of the 12 projects were to do with cycling. Evidence from national road traffic estimates shows that for the group of 10 large projects for which data were variable, there was a fall in car traffic between 2009-2011. General picture was of a significant amount of activity to encourage cycling, but rather limited evidence to assess the effect of this activity on overall cycling levels. Nevertheless, accepting limitations of the data, all seven large projects that had implemented many cycling interventions showed some indications of increases in cycling since the start of the programme. |
|                       |      | UK | Adults and Children | Various | Details of CENTRO (Smart Network, Smarter Choices) programme                                               | Environmental restructuring (physical)<br><br>Training                   |                                                                                                                                                                                                                                                                                                                                                                                                                                                                                                                                                                                                                   |
|                       |      | UK | Adults              | Various | Nottingham Area Local Sustainable Transport Fund (LSTF) Programme details                                  | Enablement                                                               |                                                                                                                                                                                                                                                                                                                                                                                                                                                                                                                                                                                                                   |
|                       |      | UK | Adults              | Various | Solent (A Better Connected South Hampshire) project                                                        | Incentivisation                                                          |                                                                                                                                                                                                                                                                                                                                                                                                                                                                                                                                                                                                                   |
|                       |      | UK | Adults              | Various | Details on Telford Future – Local Action for Sustainable Growth                                            | Training                                                                 |                                                                                                                                                                                                                                                                                                                                                                                                                                                                                                                                                                                                                   |
|                       |      | UK | Adults              | Various | TfGM (Sustainable Travel in Greater Manchester) project                                                    | Environmental restructuring (physical)<br><br>Training<br><br>Enablement |                                                                                                                                                                                                                                                                                                                                                                                                                                                                                                                                                                                                                   |

|  |    |                     |         |                                                       |                                                                                 |  |
|--|----|---------------------|---------|-------------------------------------------------------|---------------------------------------------------------------------------------|--|
|  |    |                     |         |                                                       | Incentivisation                                                                 |  |
|  | UK | Adults              | Various | Details on the Bournemouth "Three Towns" project      | Environmental restructuring (physical)<br><br>Incentivisation                   |  |
|  | UK | Adults              | Various | Details on cycling promotion efforts in Hertfordshire | Incentivisation<br><br>Environmental restructuring (social)                     |  |
|  | UK | Adults              | Various | Details on cycling promotion efforts in Merseyside    | Enablement<br><br>Training<br><br>Education                                     |  |
|  | UK | Adults and Children | Various | Details on cycling promotion efforts in Reading       | Environmental restructuring (physical)<br><br>Persuasion<br><br>Incentivisation |  |

|                     |      |    |                     |           |                                                                                           |                                                   |                                             |
|---------------------|------|----|---------------------|-----------|-------------------------------------------------------------------------------------------|---------------------------------------------------|---------------------------------------------|
|                     |      |    |                     |           |                                                                                           | Enablement                                        |                                             |
|                     |      | UK | Adults and children | Various   | Details on cycling promotion efforts in Surrey                                            | Environmental restructuring (physical and social) |                                             |
|                     |      |    |                     |           |                                                                                           | Enablement                                        |                                             |
|                     |      |    |                     |           |                                                                                           | Training                                          |                                             |
|                     |      | UK | Adults and Children | Various   | Details on the WEST project (West of England Sustainable Travel)                          | Education                                         |                                             |
|                     |      |    |                     |           |                                                                                           | Environmental restructuring (social)              |                                             |
| Wall <sup>119</sup> | 2017 | UK | Adults              | Workplace | Evaluation of the Portsmouth Big Green Commuter Challenge. Employees in Portsmouth n=928. | Incentivisation                                   | No difference in % of commutes made by bike |
| Cope <sup>120</sup> | 2017 | UK | Adults              | Various   | Monitoring project report of the cycling demonstration towns programme                    | Environmental restructuring (physical and social) | Evaluation not reported                     |
|                     |      |    |                     |           |                                                                                           | Training                                          |                                             |

|                                |      |        |          |           |                                                                                                                                                                                                |                                                                                   |                                                                                                                                                                                                                                                                                                                                                            |
|--------------------------------|------|--------|----------|-----------|------------------------------------------------------------------------------------------------------------------------------------------------------------------------------------------------|-----------------------------------------------------------------------------------|------------------------------------------------------------------------------------------------------------------------------------------------------------------------------------------------------------------------------------------------------------------------------------------------------------------------------------------------------------|
|                                |      |        |          |           |                                                                                                                                                                                                | Education<br>Enablement                                                           |                                                                                                                                                                                                                                                                                                                                                            |
| CyclingScotland <sup>121</sup> | 2017 | UK     | All      | Various   | Cycling Scotland 2016-2017 Annual Report and Accounts                                                                                                                                          | Training                                                                          | Evaluation not reported                                                                                                                                                                                                                                                                                                                                    |
| Pronello <sup>122</sup>        | 2017 | France | Adults   | Online    | The effects of the multimodal real time information systems on the travel behaviour (n=50).                                                                                                    | Education                                                                         | The introduction of Optimod'Lyon did not produce any change in the use of car, motorcycles, bicycles and Velov'v (bike-sharing) in autumn/winter, spring/summer or weekend (evaluation data n=46)                                                                                                                                                          |
| Vairo <sup>123</sup>           | 2017 | USA    | Adults   | Workplace | Qualitative investigation of best practices for businesses promoting cycling. Employees in workplaces enrolled in the Bike-friendly Business programme. N=16.                                  | Incentivisation<br>Environmental restructuring (social and physical)<br>Education | Businesses reported the creation of a culture for cycling, providing adequate bike parking/infrastructure and maintenance facilities, investing in education, offering either financial or group-based incentives and including competitions for promoting biking. Interviewees also noted the importance of engaging with the community to support biking |
| Villa-Gonzalez <sup>124</sup>  | 2017 | Spain  | Children | School    | Effects of a school-based intervention on active commuting to school. Pupils from 5 schools taking part in an intervention to increase W+C to school. n=469 participated in study. Duration: 8 | Persuasion                                                                        | The intervention group had higher rates of cycling to school than control group for boys only (p = 0.04)                                                                                                                                                                                                                                                   |

|                        |      |                     |                 |            |                                                                                                                                                                                                                                                                  |                                                                           |                                                                                                                                                                                     |
|------------------------|------|---------------------|-----------------|------------|------------------------------------------------------------------------------------------------------------------------------------------------------------------------------------------------------------------------------------------------------------------|---------------------------------------------------------------------------|-------------------------------------------------------------------------------------------------------------------------------------------------------------------------------------|
|                        |      |                     |                 |            | months.                                                                                                                                                                                                                                                          |                                                                           |                                                                                                                                                                                     |
| Bopp <sup>125</sup>    | 2018 | USA                 | Children/Adults | University | Development, implementation and evaluation of Active Lions: a campaign to promote active travel to university campus. University students and employees at large University in North Eastern USA<br><br>N=563 students and n=999 employees.                      | Education<br><br>Persuasion                                               | Intervention did not increase cycling in staff or students.                                                                                                                         |
| Chapman <sup>126</sup> | 2018 | New Zealand         | All             | Community  | Results of a quasi-experimental study of an intervention to encourage walking and cycling. All household members of 10 years of age in different cities - respondents to ACTIVE survey and NZ travel survey                                                      | Education<br><br>Persuasion<br><br>Environmental restructuring (physical) | Findings from this study reported in Keall [86].                                                                                                                                    |
| Stark <sup>127</sup>   | 2018 | Germany and Austria | Children        | School     | The effectiveness of an intervention to promote active travel modes in early adolescence. Adolescents from four secondary schools in Austria and Germany.<br><br>N=169 took part in both waves and all surveys.<br><br>12 x school lessons at 50 min per lesson. | Education<br><br>Persuasion<br><br>Incentivisation                        | Findings suggest that the intervention was effective in changing attitudes, perceived behavioral control (PBC) and intentions to use non-motorized travel modes more, and car less. |



|                                |      |    |                     |                              |                                                                                                                                                                                                |                                                                                                 |                                                                                                                                                                                                                                                                                                                                                                                                                                                                                                                                                                                                                          |
|--------------------------------|------|----|---------------------|------------------------------|------------------------------------------------------------------------------------------------------------------------------------------------------------------------------------------------|-------------------------------------------------------------------------------------------------|--------------------------------------------------------------------------------------------------------------------------------------------------------------------------------------------------------------------------------------------------------------------------------------------------------------------------------------------------------------------------------------------------------------------------------------------------------------------------------------------------------------------------------------------------------------------------------------------------------------------------|
| Secker <sup>128</sup>          | 2018 | UK | Children and Adults | School                       | Evaluation of Go-Ride program. Children and their families using the Go-Ride-Go website<br><br>47% of young participants female, 19% from BAME backgrounds, 15% with additional support needs. | Education<br><br>Environmental restructuring (social)<br><br>Incentivisation                    | Evaluation data were drawn from survey responses from 85 practitioners (56 of whom are currently engaged with the programme), counterfactual interviews with senior representatives of partaking organisations, telephone interviews with 20 lead practitioners in schools, and site visits to 3 schools in which Go-Ride Go is being delivered. Over 80% of survey respondents believe that Go-Ride GO has increased young participants' readiness (81%) and confidence (83%), to cycle, cycling skills (85%), and enjoyment of cycling (81%). 63% thought that programme increased frequency of participants' cycling. |
| British Cycling <sup>129</sup> | 2018 | UK | All                 | Other (national trust sites) | Report on British Cycling's National Trust Update. Description of cycling promotion approaches.                                                                                                | Enablement<br><br>Incentivisation<br><br>Environmental restructuring (social)<br><br>Persuasion | Evaluation not reported                                                                                                                                                                                                                                                                                                                                                                                                                                                                                                                                                                                                  |
| Hopkinson <sup>130</sup>       | 2018 | UK | Various             | Various                      | Report: Addendum to Rapid Evidence Assessment. Cycling and walking investment strategy - production of a model to aid policy planning                                                          | Enablement<br><br>Training                                                                      | Evaluation not reported                                                                                                                                                                                                                                                                                                                                                                                                                                                                                                                                                                                                  |

|  |  |  |  |  |  |                                      |  |
|--|--|--|--|--|--|--------------------------------------|--|
|  |  |  |  |  |  | Environmental restructuring (social) |  |
|--|--|--|--|--|--|--------------------------------------|--|

1. Michie S, Stralen vMM, West R. The behaviour change wheel: a new method for characterising and designing behaviour change interventions. *Implementation Science* 2011;6
2. Mayer J, Geller ES. MOTIVATING ENERGY EFFICIENT TRAVEL: A COMMUNITY-BASED INTERVENTION FOR ENCOURAGING BIKING, 1982:99-112.
3. Alcott R, DeCindis MM. Clean Air Force Campaign 1989-1990: Programs, Attitudes, and Commute Behavior Changes. *Transportation Research Record* 1991;1321:34-44.
4. Shoup D. Evaluating the Effects of Parking Cash Out: Eight Case Studies: Institute of transportational studies, University of California, 1997.
5. Macarthur C, Parkin PC, Sidky M, et al. Evaluation of a bicycle skills training program for young children: a randomized controlled trial. *Injury Prevention* 1998;4(2):116. doi: 10.1136/ip.4.2.116
6. Cooper C. Evaluation of a bicycle skills training program for young children. *Injury Prevention* 1999;5(1):78. doi: 10.1136/ip.5.1.78-a
7. Pucher J, Komanoff C, Schimek P. Bicycling renaissance in North America? Recent trends and alternative policies to promote bicycling. *Transportation Research Part a-Policy and Practice* 1999;33(7-8):625-54. doi: 10.1016/s0965-8564(99)00010-5
8. Cleary J, McClintock H. Evaluation of the Cycle Challenge project: a case study of the Nottingham Cycle-Friendly Employers' project. *Transport Policy* 2000;7(2):117-25. doi: 10.1016/S0967-070X(99)00028-1
9. Mutrie N, Carney C, Blamey A, et al. "Walk in to Work Out": a randomised controlled trial of a self help intervention to promote active commuting. *Journal of Epidemiology and Community Health* 2002;56:407-12.
10. TravelSmart. TravelSmart suburbs Brisbane Pilot - Final Report of the Project Manager. In: TravelSmart, ed., 2002.
11. Staunton CE, Hubsmith D, Kallins W. Promoting Safe Walking and Biking to School: The Marin County Success Story. *American Journal of Public Health* 2003;93(9):1431-34.
12. Merom D, Bauman A, Vita P, et al. An environmental intervention to promote walking and cycling—the impact of a newly constructed Rail Trail in Western Sydney. *Preventive Medicine* 2003;36(2):235-42. doi: 10.1016/S0091-7435(02)00025-7
13. Rowland D, Diguseppi C, Gross M, et al. Randomised controlled trial of site specific advice on school travel patterns. *Archives of Disease in Childhood* 2003;88(1):8. doi: 10.1136/adc.88.1.8
14. TravelSmart. Viernheim Household Transport, 2003.

15. TravelSmart. Travel Behaviour Change Program for parts of the Perth Metropolitan Area under the TravelSmart program 2001 to 2005, 2004.
16. Wen LM, Orr N, Bindon J, et al. Promoting active transport in a workplace setting: evaluation of a pilot study in Australia. *Health Promotion International* 2005;20(2):123-33. doi: 10.1093/heapro/dah602
17. Bowles HR, Rissel C, Bauman A. Mass community cycling events: Who participates and is their behaviour influenced by participation? *International Journal of Behavioral Nutrition and Physical Activity* 2006;3(1):<xocs:firstpage xmlns:xocs="" />. doi: 10.1186/1479-5868-3-39
18. Telfer B, Rissel C, Bindon J, et al. Encouraging cycling through a pilot cycling proficiency training program among adults in central Sydney. *Journal of Science and Medicine in Sport* 2006;9(1):151-56. doi: 10.1016/j.jsams.2005.06.001
19. TravelSmart. TravelSmart in Doncaster: final report on the Individualised travel marketing campaign in Bessacarr, 2006.
20. Martens K. Promoting bike-and-ride: The Dutch experience. *Transportation Research Part a-Policy and Practice* 2007;41(4):326-38. doi: 10.1016/j.tra.2006.09.010
21. Groesz L. A conceptual evaluation of a school-based utilitarian exercise model. In: Holahan CJ, ed.: ProQuest Dissertations Publishing, 2007.
22. Rose G, Marfurt H. Travel behaviour change impacts of a major ride to work day event. *Transportation Research Part* 2007;A(41):351-64.
23. TravelSmart. International Review, 2007.
24. Darling H, Richards R. Kids on bikes: A community intervention. *Preventive Medicine* 2008;46(1):82-82. doi: 10.1016/j.ypmed.2007.07.033
25. Fesperman C, Evenson K, Rodriguez D, et al. A comparative case study on active transport to and from school. *Public health research, practice and policy* 2008;5(2):1-11.
26. Wen LM, Fry D, Merom D, et al. Increasing active travel to school: Are we on the right track? A cluster randomised controlled trial from Sydney, Australia. *Preventive Medicine* 2008;47(6):612-18. doi: 10.1016/j.ypmed.2008.09.002
27. TravelSmart. TravelSmart in Lancashire: Final report on the individualised travel marketing campaigns in Preston, South Ribble and Lancaster (2006-2007), 2008.
28. Chatterjee K. A comparative evaluation of large-scale personal travel planning projects in England. *Transport Policy* 2009;16(6):293-305. doi: 10.1016/j.tranpol.2009.10.004
29. Hamamoto MH, Derauf DD, Yoshimura SR. Building the base: Two active living projects that inspired community participation. *American Journal of Preventive Medicine* 2009;37(6):S345-S51. doi: 10.1016/j.amepre.2009.09.025
30. Hemmingsson E, Uddén J, Neovius M, et al. Increased physical activity in abdominally obese women through support for changed commuting habits: a randomized clinical trial. *International Journal of Obesity* 2009;33(6):645. doi: 10.1038/ijo.2009.77
31. Hendricks K, Wilkerson R, Vogt C, et al. Transforming a Small Midwestern City for Physical Activity: From the Sidewalks Up. *J Phys Act Health* 2009;6(6):690-98. doi: 10.1123/jpah.6.6.690
32. Tenbrink DS, McMunn R, Panken S. Project U-Turn: Increasing Active Transportation in Jackson, Michigan. *American Journal of Preventive Medicine* 2009;37(6):S329-S35. doi: 10.1016/j.amepre.2009.09.004
33. van Stralen MM, de Vries H, Mudde AN, et al. The working mechanisms of an environmentally tailored physical activity intervention for older adults: a randomized controlled trial. *International Journal of Behavioral Nutrition and Physical Activity* 2009;6 doi: 10.1186/1479-5868-6-83
34. Cavill N, Cope A. Valuing increased cycling in cycling demonstration towns. 2009

35. Geraghty AB, Seifert W, Preston T, et al. Partnership Moves Community Toward Complete Streets. *American Journal of Preventive Medicine* 2009;37(6):S420-S27. doi: 10.1016/j.amepre.2009.09.009
36. McCreedy M, Leslie JG. Get Active Orlando: Changing the Built Environment to Increase Physical Activity. *American Journal of Preventive Medicine* 2009;37(6):S395-S402. doi: 10.1016/j.amepre.2009.09.013
37. Sloman L, Cavill N, Cope A, et al. Analysis and synthesis of evidence on the effects of investment in six cycling demonstration towns. 2009
38. Thomas IM, Sayers SP, Godon JL, et al. Bike, Walk and Wheel - A Way of Life in Columbia, Missouri. *American Journal of Preventive Medicine* 2009;37(6S2):S322-S28.
39. O'Fallon C. Bike Now: Exploring methods of building sustained participation in cycle commuting in New Zealand. *Road & Transport Research* 2010;19(2):77-89.
40. O'Fallon C. Bike Now: Encouraging cycle commuting in New Zealand. NZ Transport Agency Research Report, 2010.
41. Rissel CE, New C, Wen LM, et al. The effectiveness of community-based cycling promotion: findings from the Cycling Connecting Communities project in Sydney, Australia. *International Journal of Behavioral Nutrition and Physical Activity* 2010;7 doi: 10.1186/1479-5868-7-8
42. Cope A, Kennedy A, Ledbury M, et al. Cycling demonstration towns - an economic evaluation, 2010.
43. Mathews LB, Moodie MM, Simmons AM, et al. The process evaluation of It's Your Move! , an Australian adolescent community-based obesity prevention project.(Research article)(Report). *BMC Public Health* 2010;10:448.
44. Wen LM, Kite J, Rissel C. Is there a role for workplaces in reducing employees' driving to work? Findings from a cross-sectional survey from inner-west Sydney, Australia. *BMC Public Health* 2010;10(1) doi: 10.1186/1471-2458-10-50
45. Ben-Elia E, Ettema D. Rewarding rush-hour avoidance: A study of commuters' travel behavior. *Transportation Research Part a-Policy and Practice* 2011;45(7):567-82. doi: 10.1016/j.tra.2011.03.003
46. Brockman R, Fox KR. Physical activity by stealth? The potential health benefits of a workplace transport plan. *Public Health* 2011;125(4):210-16. doi: 10.1016/j.puhe.2011.01.005
47. Buliung R, Faulkner G, Beesley T, et al. School Travel Planning: Mobilizing School and Community Resources to Encourage Active School Transportation. *Journal of School Health* 2011;81(11):704-12. doi: 10.1111/j.1746-1561.2011.00647.x
48. Burke MI. Are Cycle Centers Effective Transport Interventions? Evaluating King George Square Cycle Center in Brisbane, Australia. *Transportation Research Record* 2011(2247):118-25. doi: 10.3141/2247-14
49. Hinckson E, Badland HM. School Travel Plans: Preliminary Evidence for Changing School-Related Travel Patterns in Elementary School Children. *Am J Health Promot* 2011;25(6):368-71. doi: 10.4278/ajhp.090706-ARB-217
50. Urbanczyk R. Promoting cycling for everyone as daily transport mode: lessons learnt in five very different cities, 2011.
51. Børrestad LAB, Østergaard L, Andersen LB, et al. Experiences from a randomised, controlled trial on cycling to school: Does cycling increase cardiorespiratory fitness? *Scandinavian Journal of Public Health* 2012;40(3):245-52. doi: 10.1177/1403494812443606
52. Chatterjee K, Sherwin H, Jain J, et al. Conceptual Model to Explain Turning Points in Travel Behavior Application to Bicycle Use. *Transp Res Record* 2012;1(2322):82-90. doi: 10.3141/2322-09
53. Christensen J, Chatterjee K, Marsh S, et al. Evaluation of the Cycling city and Towns Programme: Qualitative Research with Residents, 2012.

54. Claus JM, Dessauer M, Brennan LK. Programs and promotions: approaches by 25 Active Living by Design partnerships. *American journal of preventive medicine* 2012;43(5 Suppl 4):S320-8. doi: <https://dx.doi.org/10.1016/j.amepre.2012.07.005>
55. Jariyasunant J, Carrel A, Ekambaram V, et al. The Quantified Traveler: Changing transport behavior with personalized travel data feedback. 2012
56. Crawford S, Garrard J. A Combined Impact-Process Evaluation of a Program Promoting Active Transport to School: Understanding the Factors That Shaped Program Effectiveness. *Journal of Environmental and Public Health* 2013;2013(2013) doi: 10.1155/2013/816961
57. Dubuy V, De Cocker K, De Bourdeaudhuij I, et al. Evaluation of a workplace intervention to promote commuter cycling: a RE-AIM analysis. *BMC PUBLIC HEALTH* 2013;13(1) doi: 10.1186/1471-2458-13-587
58. Goodman A, Panter J, Sharp SJ, et al. Effectiveness and equity impacts of town-wide cycling initiatives in England: A longitudinal, controlled natural experimental study. *Social Science and Medicine* 2013;97 doi: 10.1016/j.socscimed.2013.08.030
59. Johnson R, Margolis S. A review of the effectiveness of adult cycle training in Tower Hamlets, London. *Transport Policy* 2013;30:254-61. doi: 10.1016/j.tranpol.2013.09.005
60. Bamberg S. Applying the stage model of self-regulated behavioral change in a car use reduction intervention. *Journal of Environmental Psychology* 2013;33(C):68-75. doi: 10.1016/j.jenvp.2012.10.001
61. Buckley A, Lowry MB, Brown H, et al. Evaluating safe routes to school events that designate days for walking and bicycling. *Transport Policy* 2013;30:294-300. doi: 10.1016/j.tranpol.2013.09.021
62. Henderson S, Tanner R, Klanderma N, et al. Safe Routes to School: A Public Health Practice Success Story-Atlanta, 2008-2010. *J Phys Act Health* 2013;10(2):141-42. doi: 10.1123/jpah.10.2.141
63. Lachapelle U. Participation and Incentive Choice of Participants in an Early Vehicle Retirement Program in Quebec, Canada. *Transp Res Record* 2013;2375(2375):8-17. doi: 10.3141/2375-02
64. McDonald NC, Yang YZ, Abbott SM, et al. Impact of the Safe Routes to School program on walking and biking: Eugene, Oregon study. *Transport Policy* 2013;29:243-48. doi: 10.1016/j.tranpol.2013.06.007
65. Panter J, Corder K, Griffin SJ, et al. Individual, socio-cultural and environmental predictors of uptake and maintenance of active commuting in children: longitudinal results from the SPEEDY study. *International Journal of Behavioral Nutrition and Physical Activity* 2013;10 doi: 10.1186/1479-5868-10-83
66. Bungum TJ, Clark S, Aguilar B. The Effect of an Active Transport to School Intervention at a Suburban Elementary School. *American Journal of Health Education* 2014;45(4):205-09. doi: 10.1080/19325037.2014.916635
67. Caulfield B. Re-cycling a city - Examining the growth of cycling in Dublin. *Transportation Research Part a-Policy and Practice* 2014;61:216-26. doi: 10.1016/j.tra.2014.02.010
68. Christiansen LB, Toftager M, Ersboll AK, et al. Effects of a Danish multicomponent physical activity intervention on active school transport. *Journal of Transport & Health* 2014;1(3):174-81. doi: 10.1016/j.jth.2014.05.002
69. Ducheyne F, De Bourdeaudhuij I, Lenoir M, et al. Effects of a cycle training course on children's cycling skills and levels of cycling to school. *Accident Analysis and Prevention* 2014;67:49-60. doi: 10.1016/j.aap.2014.01.023

70. Gutierrez CM, Slagle D, Figueras K, et al. Crossing guard presence: Impact on active transportation and injury prevention. *Journal of Transport & Health* 2014;1(2):116-23. doi: 10.1016/j.jth.2014.01.005
71. Hamre A, Buehler R. Commuter Mode Choice and Free Car Parking, Public Transportation Benefits, Showers/Lockers, and Bike Parking at Work: Evidence from the Washington, DC Region. *Journal of Public Transportation* 2014;17(2):67-91. doi: 10.5038/2375-0901.17.2.4
72. Chapman R, Howden-Chapman P, Keall M, et al. Increasing active travel: aims, methods and baseline measures of a quasi-experimental study.(Survey). *BMC Public Health* 2014;14(1) doi: 10.1186/1471-2458-14-935
73. Lanzendorf M, Busch-Geertsema A. The cycling boom in large German cities-Empirical evidence for successful cycling campaigns. *Transport Policy* 2014;36:26-33. doi: 10.1016/j.tranpol.2014.07.003
74. Norwood P, Eberth B, Farrar S, et al. Active travel intervention and physical activity behaviour: An evaluation. *Social Science & Medicine* 2014 doi: 10.1016/j.socscimed.2014.05.003
75. Rissel C, Watkins G. Impact on cycling behavior and weight loss of a national cycling skills program (AustCycle) in Australia 2010-2013. *Journal of Transport & Health* 2014;1(2):134-40. doi: 10.1016/j.jth.2014.01.002
76. Bothos E, Prost S, Schrammel J, et al. Watch your emissions: Persuasive strategies and choice architecture for sustainable decisions in urban mobility. *PsychNology Journal* 2014;12(3):107-26.
77. Del Duca GF, Barros MVGd, Silva KS, et al. Effectiveness on physical activity indicators of an intervention delivered to high school students. *Revista Brasileira de Cineantropometria & Desempenho Humano* 2014;16(suppl 1):13-24. doi: 10.5007/1980-0037.2014v16s1p13
78. Engelberg JK, Carlson JA, Black ML, et al. CicloVía participation and impacts in San Diego, CA: The first CicloSDias. *Preventive Medicine* 2014;69:S66-S73. doi: 10.1016/j.ypmed.2014.10.005
79. Hoffman MF, Hayes S, Napolitano MA. Urban Youths' Experiences and Perceptions of a Community Cycling Initiative. *Urban Studies* 2014;51(2):300-18. doi: 10.1177/0042098013489741
80. Kinton L, Irvin K. Walk or ride, get moving San Antonio: San Antonio Parks and Recreation Department encourages people to get active, get fit.(Member to Member). *Parks & Recreation* 2014;49(4):22.
81. Nordback K. Measuring traffic reduction from bicycle commuting. *Transportation Research Record* 2014;2468(2468):92-99. doi: 10.3141/2468-11
82. Stewart O, Moudon AV, Claybrooke C. Multistate Evaluation of Safe Routes to School Programs. *American Journal of Health Promotion* 2014;28(3\_suppl):S89-S96. doi: 10.4278/ajhp.130430-QUAN-210
83. Chandler J, Flynn J, Bassett D, et al. A Community-Based After-School Program to Promote Bicycling Skills and Knowledge: Kids Can Bike! *Journal of Park and Recreation Administration* 2015;33(4)
84. Diniz IMS, S Duarte MdF, Peres KG, et al. Active Commuting by Bicycle: Results of an Educational Intervention Study. *Journal of physical activity & health* 2015;12(6):801. doi: 10.1123/jpah.2013-0215
85. Fyhri A, Fearnley N. Effects of e-bikes on bicycle use and mode share. *Transportation Research Part D-Transport and Environment* 2015;36:45-52. doi: 10.1016/j.trd.2015.02.005
86. Gamble T, Walker I, Laketa A. Bicycling campaigns promoting health versus campaigns promoting safety: A randomized controlled online study of 'dangerization'. *Journal of Transport & Health* 2015;2(3):369-78. doi: 10.1016/j.jth.2015.05.007

87. Keall M, Chapman R, Howden-Chapman P, et al. Increasing active travel: results of a quasi-experimental study of an intervention to encourage walking and cycling. *Journal of Epidemiology and Community Health* 2015;69(12) doi: 10.1136/jech-2015-205466
88. Ostergaard L, Stackel JT, Andersen LB. Effectiveness and implementation of interventions to increase commuter cycling to school: a quasi-experimental study.(Report). *BMC Public Health* 2015;15(1) doi: 10.1186/s12889-015-2536-1
89. Petrunoff N, Rissel C, Wen LM, et al. Carrots and sticks vs carrots: Comparing approaches to workplace travel plans using disincentives for driving and incentives for active travel. *Journal of Transport & Health* 2015;2(4):563-67. doi: 10.1016/j.jth.2015.06.007
90. Villa-Gonzalez E, Ruiz JR, Garzon PC. Effectiveness Of An Active Commuting School-based Intervention At 6-month Follow-up. *Medicine and Science in Sports and Exercise* 2015;47(5):520-20. doi: 10.1249/01.mss.0000477864.79438.48
91. Poslad S, Ma A, Wang ZC, et al. Using a Smart City IoT to Incentivise and Target Shifts in Mobility Behaviour-Is It a Piece of Pie? *Sensors* 2015;15(6):13069-96. doi: 10.3390/s150613069
92. League B. 4 big ideas from small towns. *American Bicyclist*, 2015:35.
93. Behrendt F. Why cycling matters for Smart Cities. Internet of Bicycles for Intelligent Transport. *Journal of Transport Geography* 2016;56:157-64. doi: 10.1016/j.jtrangeo.2016.08.018
94. Coombes E, Jones A. Gamification of active travel to school: A pilot evaluation of the Beat the Street physical activity intervention. *Health and Place* 2016;39:62-69. doi: 10.1016/j.healthplace.2016.03.001
95. Goodman A, van Sluijs EMF, Ogilvie D. Impact of offering cycle training in schools upon cycling behaviour: a natural experimental study. *International Journal of Behavioral Nutrition and Physical Activity* 2016;13 doi: 10.1186/s12966-016-0356-z
96. Millonig A, Wunsch M, Stibe A, et al. Gamification and social dynamics behind corporate cycling campaigns. In: Wulfhorst G, Kinigadner J, eds. *Transforming Urban Mobility*2016:33-39.
97. Petrunoff N, Wen LM, Rissel C. Effects of a workplace travel plan intervention encouraging active travel to work: outcomes from a three-year time-series study. *Public Health* 2016;135:38-47. doi: 10.1016/j.puhe.2016.02.012
98. Teyhan A, Cornish R, Boyd A, et al. The impact of cycle proficiency training on cycle-related behaviours and accidents in adolescence: findings from ALSPAC, a UK longitudinal cohort.(Avon Longitudinal Study of Parents and Children)(Report). *BMC Public Health* 2016;16(1) doi: 10.1186/s12889-016-3138-2
99. Uttley J, Lovelace R. Cycling promotion schemes and long-term behavioural change: A case study from the University of Sheffield. *Case Studies on Transport Policy* 2016;4(2):133-42. doi: 10.1016/j.cstp.2016.01.001
100. Ang-Olson J, Hom S, Vogler U, et al. Evaluation of the Metropolitan Transportation Commission's Climate Initiatives Program. *Transportation Research Record* 2016(2572):86-94. doi: 10.3141/2572-10
101. Castellanos S. Delivering modal-shift incentives by using gamification and smartphones: A field study example in Bogota, Colombia. *Case Studies on Transport Policy* 2016;4(4):269-78. doi: 10.1016/j.cstp.2016.08.008
102. Chaston A. British Cycling Higher Education Recreational Pilot 2015-2016 - Evaluation Report, 2016.
103. Scotland C. Cycling Scotland: The Second CAPS Progress Report, 2016.

104. Harms L, Bertolini L, Brommelstroet MT. Performance of Municipal Cycling Policies in Medium-Sized Cities in the Netherlands since 2000. *Transport Reviews* 2016;36(1):134-62. doi: 10.1080/01441647.2015.1059380
105. Hidalgo D, Miranda L, Lleras N, et al. Al Colegio en Bici Bike-to-School Program in Bogota, Colombia. *Transportation Research Record* 2016(2581):66-70. doi: 10.3141/2581-08
106. Semajski I, Lopez Aguirre A, De Mol J, et al. Policy 2.0 platform for mobile sensing and incentivized targeted shifts in mobility behavior. *SENSORS* 2016;16(7) doi: 10.3390/s16071035
107. Swift S, Green M, Hillage J, et al. Impact of the Cycle to Work Scheme: Evidence Report. In: Studies IoE, ed., 2016.
108. van Lierop D, Bebronne M, Ei-Geneidy A. Bicycle Education for Children Evaluation of a Program in Montreal, Quebec, Canada. *Transportation Research Record* 2016(2587):23-33. doi: 10.3141/2587-04
109. Aittasalo M, Tiilikainen J, Tokola K, et al. Socio-Ecological Intervention to Promote Active Commuting to Work: Protocol and Baseline Findings of a Cluster Randomized Controlled Trial in Finland. *International Journal of Environmental Research and Public Health* 2017;14(10):1257. doi: 10.3390/ijerph14101257
110. Bernstein R, Schneider R, Welch W, et al. Biking for health: Results of a pilot randomized controlled trial examining the impact of a bicycling intervention on lower-income adults. *Wisconsin Medical Journal* 2017;116(3):154-60.
111. Blake H, Suggs LS, Coman E, et al. Active8! Technology-Based Intervention to Promote Physical Activity in Hospital Employees. *American Journal of Health Promotion* 2017;31(2):109-18. doi: 10.4278/ajhp.140415-QUAN-143
112. Cairns S, Behrendt F, Raffo D, et al. Electrically-assisted bikes: Potential impacts on travel behaviour. *Transportation Research Part A* 2017;103(C):327-42. doi: 10.1016/j.tra.2017.03.007
113. Fyhri A, Heinen E, Fearnley N, et al. A push to cycling - Exploring the e-bike's role in overcoming barriers to bicycle use with a survey and an intervention study. 2017:681-95. ISSN 1556-8318.
114. Hatfield J, Dozza M, Patton DA, et al. On the use of naturalistic methods to examine safety-relevant behaviours amongst children and evaluate a cycling education program. *Accident Analysis and Prevention* 2017;108:91-99. doi: 10.1016/j.aap.2017.08.025
115. Ho C, Mulley C, Tsai CH, et al. Area-wide travel plans-targeting strategies for greater participation in green travel initiatives: a case study of Rouse Hill Town Centre, NSW Australia. *Transportation* 2017;44(2):325-52. doi: 10.1007/s11116-015-9640-z
116. Lambe B, Murphy N, Bauman A. Active travel to primary schools in Ireland: An opportunistic evaluation of a natural experiment. *Journal of Physical Activity and Health* 2017;14(6):448-54. doi: 10.1123/jpah.2016-0429
117. Mendoza JA, Haaland W, Jacobs M, et al. Bicycle Trains, Cycling, and Physical Activity: A Pilot Cluster RCT. *American Journal of Preventive Medicine* 2017;53(4):481-89. doi: 10.1016/j.amepre.2017.05.001
118. Sloman L, Cairns S, Goodman A, et al. Meta-analysis of Outcomes of Investment in the 12 Local Sustainable Transport Fund Large Projects: Final Report, 2017.
119. Wall G, Olaniyan B, Woods L, et al. Encouraging sustainable modal shift-An evaluation of the Portsmouth Big Green Commuter Challenge. *Case Studies on Transport Policy* 2017;5(1):105-11. doi: 10.1016/j.cstp.2016.11.006



120. Cope A, Kennedy A, Crawford F, et al. Outcomes of the Cycling Demonstration Towns programme: monitoring project report. Data collection and analytical methodologies., 2017.
121. Scotland C. 2016-2017 Annual Report and Accounts, 2017.
122. Pronello C, Simão JPRV, Rappazzo V. The effects of the multimodal real time information systems on the travel behaviour. *Transportation Research Procedia*, 2017:2677-89.
123. Vairo N, Bopp M, Sims D. Best practices for businesses promoting bicycling. *International journal of Health Promotion and Education* 2017;55(5):298-310.
124. Villa-Gonzalez E, Ruiz JR, Mendoza JA, et al. Effects of a school-based intervention on active commuting to school and health-related fitness.(Report). *BMC Public Health* 2017;17(1) doi: 10.1186/s12889-016-3934-8
125. Bopp M, Sims D, Matthews SA, et al. Development, Implementation, and Evaluation of Active Lions: A Campaign to Promote Active Travel to a University Campus. *American Journal of Health Promotion* 2018;32(3):536-45. doi: 10.1177/0890117117694287
126. Chapman R, Keall M, Howden-Chapman P, et al. A Cost Benefit Analysis of an Active Travel Intervention with Health and Carbon Emission Reduction Benefits. *International Journal of Environmental Research and Public Health* 2018;15(5) doi: 10.3390/ijerph15050962
127. Stark J, Berger WJ, Hossinger R. The effectiveness of an intervention to promote active travel modes in early adolescence. *Transportation Research Part F-Traffic Psychology and Behaviour* 2018;55:389-402. doi: 10.1016/j.trf.2018.03.017
128. Secker M, Foad A. Go-Ride Go Evaluation Final Report: SPEAR - Canterbury Christ Church University, 2018.
129. Cycling B. National Trust Update, 2018.
130. Hopkinson L, Heinen E, Schuller Z, et al. Cycling and Walking Investment Strategy - Production of a Model to Aid Policy Planning - Paper 1: Addendum to Rapid Evidence Assessment, 2018.
